# Supplementary material for: A metal-, solvent-, halogen-, and additive-free catalysis for CO 2 fixation by carbon dots
Source: Royal Society of Chemistry journal article supplement (doi:10.1039/d4ta08934k), 2025-01-01
Supplement: d4ta08934k1.pdf [file d4ta08934k1.pdf]

## Supplementary Information

# **A metal-, solvent-, halogen-, and additive-free catalysis for CO<sub>2</sub> fixation by carbon dots**

Tao Zhang, Ruijia Wang, Wei Li, Shunjun Li, Bing Tian,\* Shouxin Liu\* and Zhijun Chen\*

Key Laboratory of Bio-based Material Science and Technology of Ministry of Education, Northeast Forestry University, Harbin 150040, P. R. China

Email: tianbing@nefu.edu.cn, liushouxin@126.com, chenzhijun@nefu.edu.cn

### Table of Contents

|                                                                                               |    |
|-----------------------------------------------------------------------------------------------|----|
| <b>1. Experimental Procedures</b> .....                                                       | 2  |
| <b>1.1 Materials</b> .....                                                                    | 2  |
| <b>1.2 Methods</b> .....                                                                      | 2  |
| <b>1.3 Preparation of ST Carbon Dots Catalysts</b> .....                                      | 4  |
| <b>1.4 General Procedure for CDs-Catalyzed Reaction of CO<sub>2</sub> with Epoxides</b> ..... | 6  |
| <b>1.5 Procedure for Large-scale Reaction of Epoxides with CO<sub>2</sub></b> .....           | 7  |
| <b>1.6 Procedure for Recycling Experiments of CDs for CO<sub>2</sub> Conversion</b> .....     | 8  |
| <b>1.7 DFT Studies</b> .....                                                                  | 8  |
| <b>2. Characterization of Compounds</b> .....                                                 | 14 |
| <b>3. NMR Spectra</b> .....                                                                   | 20 |
| <b>4. Supplementary References</b> .....                                                      | 30 |

## 1. Experimental Procedures

### 1.1 Materials

All chemicals were purchased from commercial sources and used without further purification, unless otherwise noted. Syringic acid (SA, Aladdin, 98.0%), triethylamine (TEA, Aladdin, 99.0%), benzyl glycidyl ether (TCI, 97.0%), (*R*)-benzyl glycidyl ether (Adamas, 98%), glycidyl phenyl ether (TCI, 99.0%), styrene oxide (Aladdin, 98.0%), (*R*)-Styrene oxide (Adamas, 99%), furfuryl glycidyl ether (Aladdin, 96.0%), 1,2-Epoxyhexane (TCI, 96.0%), Epibromohydrin (TCI, 97.0%), Epichlorohydrin (TCI, 99.0%), allyl glycidyl ether (TCI, 99%), glycidyl propargyl ether (Aladdin, 90.0%), 1,4-Butanediol diglycidyl ether (TCI, 93.0%), chloroform-*d* (CDCl<sub>3</sub>, Adamas), 2,2,2-Trifluoro-*N,N*-dimethylacetamide (Bidepharm, 98%). CO<sub>2</sub> was supplied from Ha Qinghua Gas Technology Co, Ltd with a purity of >99.5%.

### 1.2 Methods

Reactions were monitored by thin-layer chromatography (TLC) carried out on 25 mm silica gel plates. Visualization was performed with a UV-lamp (254 nm) or KMnO<sub>4</sub> solution. Flash column chromatography was performed on silica gel (particle size 230-400 mesh, purchased from Canada) and eluted with petroleum ether/ethyl acetate. <sup>1</sup>H NMR spectra were recorded on Bruker-500 MHz spectrometer. The chemical shifts (δ) are given in parts per million relative to CDCl<sub>3</sub> (7.26 ppm for <sup>1</sup>H) or TMS (0 ppm for <sup>1</sup>H). The transmission electron microscopy (TEM) and high-resolution TEM (HRTEM) images were acquired on JEOL JEM-2100 instrument. X-ray diffraction (XRD) patterns were collected on the Shimadzu XRD-6100 powder diffractometer. Raman spectra were recorded using a LabRAM HR Evolution confocal Raman microscope (Horiba, ltd., Kyoto, Japan). Fourier Transform Infrared Spectrometric (FT-IR) analysis of samples were recorded with a PerkinElmer Frontier FT-IR spectrometer. The chemical composition, content and state of the samples were determined by X-ray photoelectron spectroscopy (XPS, Thermo Scientific ESCALAB 250Xi). High performance liquid chromatography was performed on Agilent Series HPLC, using OD-H chiral column eluted with a mixture of hexane and isopropyl alcohol.

**Table S1.** Epoxide substrates.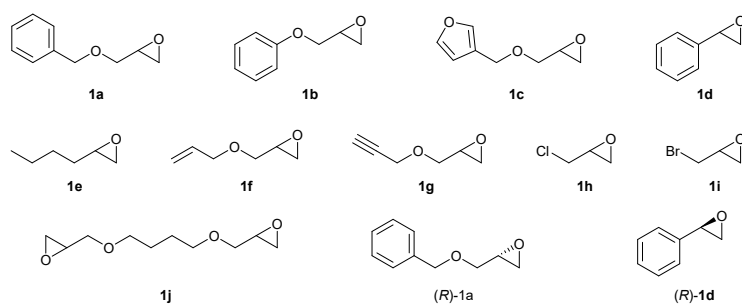**Table S2.** The optimization of the reaction conditions.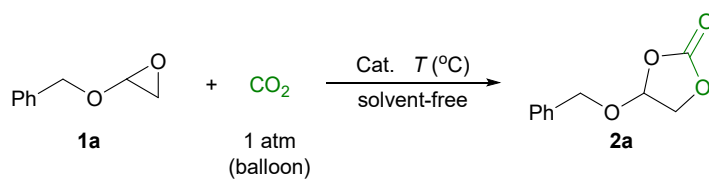

| Entry | Catalyst                | T ( $^{\circ}\text{C}$ ) | Yield (%) <sup>b</sup> | Sel. (%) <sup>b</sup> |
|-------|-------------------------|--------------------------|------------------------|-----------------------|
| 1     | ST-CDs (10 wt%)         | 120                      | 96                     | 99                    |
| 2     | ST-CDs (10 wt%)         | 100                      | 96                     | 99                    |
| 3     | ST-CDs (10 wt%)         | 80                       | 95                     | 99                    |
| 4     | ST-CDs (10 wt%)         | 60                       | 36                     | 99                    |
| 5     | ST-CDs (10 wt%)         | 40                       | 10                     | 99                    |
| 6     | ST-CDs (12.5 wt%)       | 80                       | 95                     | 99                    |
| 7     | ST-CDs (7.5 wt%)        | 80                       | 88                     | 99                    |
| 8     | ST-CDs (5.0 wt%)        | 80                       | 83                     | 99                    |
| 9     | ST-CDs (2.5 wt%)        | 80                       | 66                     | 99                    |
| 10    | SA (10 wt%)             | 80                       | 0                      | -                     |
| 11    | $\text{NEt}_3$ (10 wt%) | 80                       | 5                      | - <sup>c</sup>        |
| 12    | none                    | 80                       | 0                      | -                     |
| 13    | 4-ST-CDs (10 wt%)       | 80                       | 52                     | 99                    |
| 14    | 1-ST-CDs (10 wt%)       | 80                       | 82                     | 99                    |

<sup>a</sup>Conditions: **1a** (5 mmol),  $\text{CO}_2$  (1 atm, ballon), the reaction was performed as neat.

<sup>b</sup>Yield and selectivity were measured by  $^1\text{H}$  NMR spectroscopy ( $\text{CDCl}_3$ ) of the crude mixture using 2,2,2-trifluoro-*N,N*-dimethylacetamide ( $\text{CF}_3$ -DMA) as internal standard.

<sup>c</sup>Not detected.

**Table S3.** The effect of CO<sub>2</sub> source.<sup>a</sup>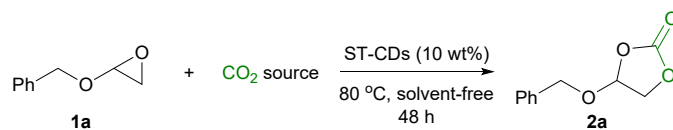

| Entry | CO <sub>2</sub> source     | 2a yield             |
|-------|----------------------------|----------------------|
| 1     | CO <sub>2</sub> /air (1/1) | 16% (16% conversion) |
| 2     | CO <sub>2</sub> /air (1/9) | 9% (10% conversion)  |
| 3     | air                        | 2% (2% conversion)   |

<sup>a</sup>Yield and conversion were measured by <sup>1</sup>H NMR spectroscopy (CDCl<sub>3</sub>) of the crude mixture using 2,2,2-trifluoro-*N,N*-dimethylacetamide (CF<sub>3</sub>-DMA) as internal standard.

**Table S4.** The effect of additive.<sup>a</sup>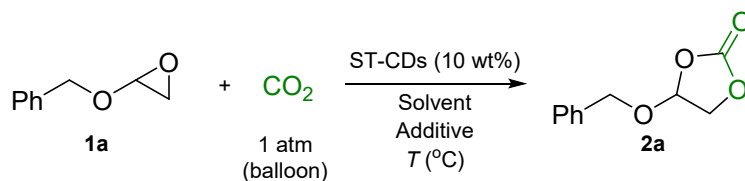

| Entry | Catalyst | Additive      | Temperature (°C) | Solvent    | Reaction time (h) | Yield of 2a (%) |
|-------|----------|---------------|------------------|------------|-------------------|-----------------|
| 1     | ST-CDs   | -             | 80               | -          | 48                | 96              |
| 2     | -        | TBAI (5 mol%) | 80               | -          | 48                | 8               |
| 3     | ST-CDs   | TBAI (5 mol%) | 80               | -          | 12                | 98              |
| 4     | ST-CDs   | TBAI (5 mol%) | 60               | -          | 24                | 94              |
| 5     | -        | -             | 80               | DMF (1 mL) | 48                | 0               |
| 6     | ST-CDs   | -             | 80               | DMF (1 mL) | 36                | 91              |

<sup>a</sup>Yield and conversion were measured by <sup>1</sup>H NMR spectroscopy (CDCl<sub>3</sub>) of the crude mixture using 2,2,2-trifluoro-*N,N*-dimethylacetamide (CF<sub>3</sub>-DMA) as internal standard.

### 1.3 Preparation of ST Carbon Dots Catalysts

The ST carbon dots (ST-CDs) catalysts were prepared by hydrothermal synthesis. Specifically, SA (2 mmol) and TEA (8 mmol) were dissolved in 30 mL ultrapure water and mixed uniformly. Then the mixed solution was transferred to a poly(tetrafluoroethylene) (Teflon)-lined reactor and carbonized at 180 °C for 10 h.

After the reaction, the reactor allowed to cool to room temperature naturally. Finally, the mixture was filtered through a 0.22  $\mu\text{m}$  syringe filter and dialyzed against ultrapure water through a 200 Da dialysis membrane for 2 days. The purified solution was dried in an oven to give the CDs (210 mg, 17.0 wt% yield). The same procedure was conducted for the preparation of CDs with ratios of SA and TEA in 4:1 and 1:1, which were name as 4-ST-CDs and 1-ST-CDs, respectively.

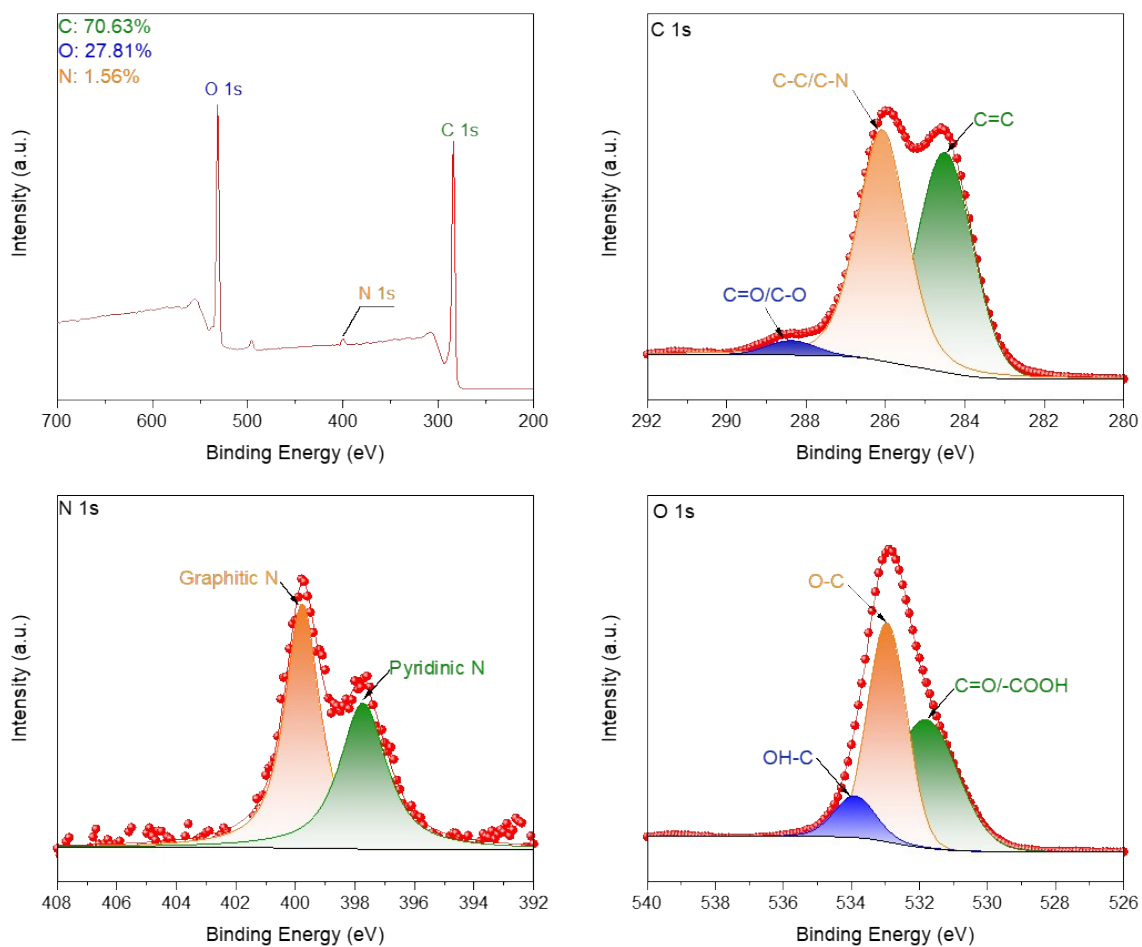

**Figure S1.** XPS of 4-ST-CDs including high resolution on C1s scan, O1s scan, and N1s scan.

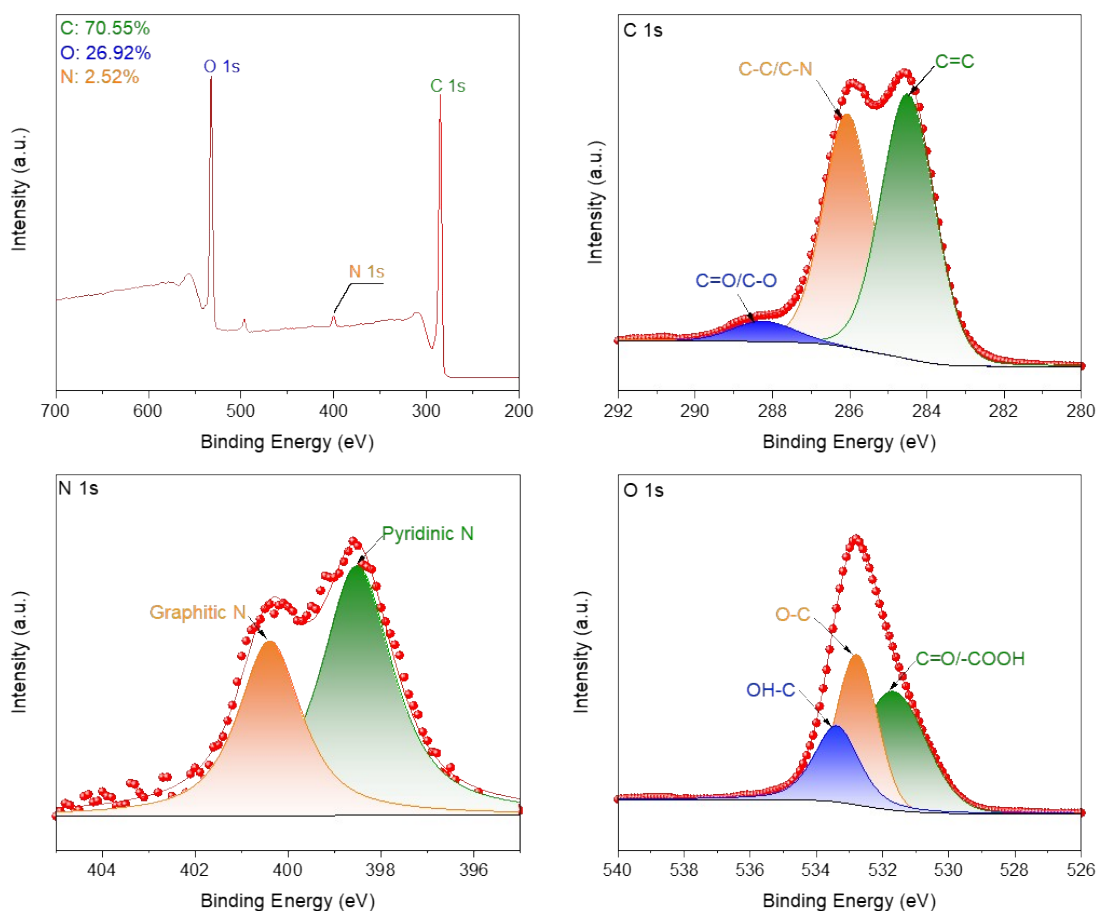

**Figure S2.** XPS of 1-ST-CDs including high resolution on C1s scan, O1s scan, and N1s scan.

#### 1.4 General Procedure for CDs-Catalyzed Reaction of CO<sub>2</sub> with Epoxides

For reaction conditions screening, epoxide **1** (5 mmol, 1 equiv.) and CDs (82.1 mg, 10 wt%) were weighted into a 25 mL reaction tube. The air in the tube was firstly replaced with CO<sub>2</sub>, and the CO<sub>2</sub> of the balloon was then allowed to flow into the tube. The reaction was stirred at 80 °C for 48 h under 1 atm of CO<sub>2</sub> atmosphere (balloon, ~ 3 L). The reaction was monitored by TLC. After the reaction was completed, the residue was purified by column chromatography on silica gel with a gradient eluent of petroleum ether/ethyl acetate to afford the desired product. For substrate screening, all procedures were conducted at 80 °C for 48 h under 1 atm of CO<sub>2</sub> atmosphere (balloon).

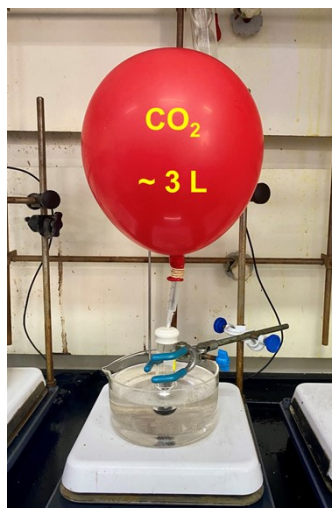

**Figure S3.** CDs-catalyzed CO<sub>2</sub> with epoxide reaction device

### 1.5 Procedure for Large-scale Reaction of Epoxides with CO<sub>2</sub>

Epoxide **1** (8.21 g, 50 mmol) and CDs (821 mg, 10 wt%) were weighted into a 50 mL flask, followed by charging with CO<sub>2</sub>. The reaction mixture was conducted at 80 °C for 96 h under 1 atm of CO<sub>2</sub> atmosphere (CO<sub>2</sub> bag, 42 L). After the reaction was completed, a certain amount of ethyl acetate (EA) was added and the mixture filtrated through a short pad of silica gel. The residue was purified by column chromatography on silica gel with a gradient eluent of petroleum ether/ethyl acetate (4/1) to afford the desired product **1** (9.786 g, 94% yield).

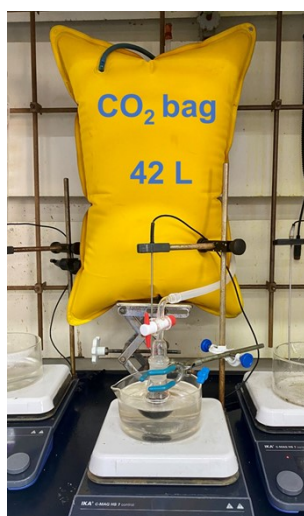

**Figure S4.** Large scale reaction device of epoxide and CO<sub>2</sub>

## 1.6 Procedure for Recycling Experiments of CDs for CO<sub>2</sub> Conversion

Epoxide **1** (5 mmol, 1 equiv.) and CDs (82.1 mg) were weighted into a 25 mL reaction tube, followed by charging with CO<sub>2</sub>. The reaction was stirred at 80 °C for 48 h under 1 atm of CO<sub>2</sub> atmosphere (balloon). At the end of the reaction, a certain amount of EA was added into the flask, the CDs sediment was formed after a 30 min standing. The supernate was removed by a dropper after centrifugation. The solid residue was washed with EA for 3 times followed by centrifugation. Finally, the solid residue was dried in oven at 105°C to remove the solvent in residue and readied for the recycling experiment. The EA solution was collected and concentrated under vacuum to afford the cyclic carbonate.

## 1.7 DFT Studies

The geometries of coronene with hydroxyl and carboxyl groups, nitrogen-doped coronene and their complexes with phenyl ethylene oxide(PEO) and CO<sub>2</sub> were all optimized under the framework of density of functional theory (DFT) with B3LYP functional<sup>3-5</sup> and 6-31g(d,p)<sup>6,7</sup> basis set. The binding energy is calculated according to the formular:  $E(\text{binding}) = E(\text{complex}) - E(\text{coronene}) - E(\text{mol})$  where  $E(\text{complex})$ ,  $E(\text{coronene})$  and  $E(\text{mol})$  are energies of complex, coronene and adsorbed molecule. The thermodynamic correction terms of the structures at 353.15K were then obtained using Shermo program.<sup>8</sup> All these DFT calculations were performed using Gaussian 16 program suite [Gaussian, Inc., Wallingford CT, 2016].

To simplify the calculation process, coronene was used as the backbone model of the carbon dots in the calculations. According to the XPS analysis for surface of CDs, 4 models of the carbon dots with -OH, and -CO<sub>2</sub>H groups on the surface, pyridinic N and graphitic N which could interact with epoxides and CO<sub>2</sub> were simulated for calculation. The models are displayed as below:



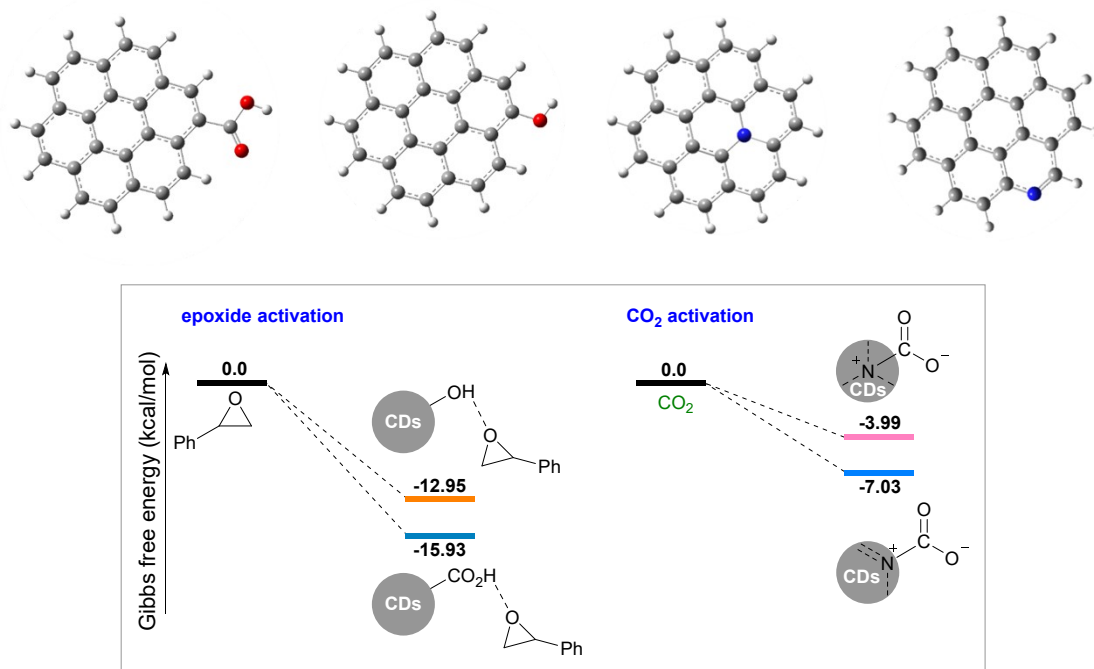

**Figure S5.** Free-energy profiles for the activation of epoxide 1d (left) and CO<sub>2</sub> (right) by ST-CDs using different activation sites (hydroxyl, carboxylic acid, graphitic N and pyridinic N) at 80 °C.

### The cartesian coordinates of the optimized geometries of the transition states and intermediates

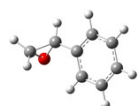

#### Styrene oxide (SO)

|   |            |             |             |
|---|------------|-------------|-------------|
| C | 7.31960000 | -0.56250000 | -2.24270000 |
| C | 7.94350000 | -0.59200000 | -0.90990000 |
| H | 7.98350000 | -0.63970000 | -3.10280000 |
| H | 7.36860000 | -0.96770000 | -0.07120000 |
| H | 9.01950000 | -0.69160000 | -0.82200000 |
| O | 7.48390000 | 0.59590000  | -1.47600000 |
| C | 5.95110000 | -1.09960000 | -2.45310000 |
| C | 4.88500000 | -0.64770000 | -1.68500000 |
| C | 5.73360000 | -2.07860000 | -3.41540000 |
| C | 3.61900000 | -1.17040000 | -1.87520000 |
| H | 5.05580000 | 0.12690000  | -0.95220000 |
| C | 4.46700000 | -2.60270000 | -3.59980000 |
| H | 6.55970000 | -2.42910000 | -4.01750000 |
| C | 3.40810000 | -2.15070000 | -2.83000000 |
| H | 2.79440000 | -0.81070000 | -1.27740000 |
| H | 4.30480000 | -3.36440000 | -4.34810000 |
| H | 2.41950000 | -2.55970000 | -2.97720000 |

#### CO<sub>2</sub>

|   |             |             |            |
|---|-------------|-------------|------------|
| O | -4.23800204 | -0.62102762 | 0.00000000 |
| C | -5.49640204 | -0.62102762 | 0.00000000 |
| O | -6.75480204 | -0.62102762 | 0.00000000 |

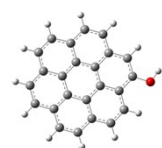

#### CDs-OH

|   |             |             |             |
|---|-------------|-------------|-------------|
| C | -1.59310000 | -5.02960000 | -0.00070000 |
| C | -0.17900000 | -5.03440000 | -0.00060000 |
| C | 0.50480000  | -3.80060000 | -0.00030000 |
| C | -0.22370000 | -2.58540000 | -0.00010000 |
| C | -1.63430000 | -2.61040000 | -0.00030000 |
| C | -2.29440000 | -3.86100000 | -0.00050000 |
| C | 1.92150000  | -3.77630000 | -0.00010000 |
| C | 0.46330000  | -1.34570000 | 0.00030000  |
| C | 1.88040000  | -1.32190000 | 0.00060000  |
| C | 2.60740000  | -2.53810000 | 0.00040000  |
| C | 2.55530000  | -0.08510000 | 0.00120000  |
| C | 1.80680000  | 1.11270000  | 0.00140000  |
| C | 0.44390000  | 1.08640000  | 0.00100000  |
| C | -0.26440000 | -0.13680000 | 0.00050000  |
| C | -1.67820000 | -0.19180000 | 0.00020000  |
| C | -2.33820000 | -1.38360000 | -0.00020000 |
| H | -3.41900000 | -1.41040000 | -0.00040000 |
| H | -2.22880000 | 0.73850000  | 0.00020000  |
| H | -2.11130000 | -5.97840000 | -0.00090000 |
| H | -3.37550000 | -3.87220000 | -0.00060000 |
| H | 2.34440000  | 2.04830000  | 0.00180000  |
| H | -0.11970000 | 2.00870000  | 0.00110000  |
| C | 0.57410000  | -6.23190000 | -0.00090000 |
| C | 1.93650000  | -6.20830000 | -0.00080000 |
| C | 2.64780000  | -4.98590000 | -0.00050000 |
| H | 0.04330000  | -7.17370000 | -0.00110000 |
| H | 2.49940000  | -7.13130000 | -0.00110000 |
| C | 4.06040000  | -4.93050000 | -0.00040000 |
| C | 4.72100000  | -3.73820000 | 0.00020000  |
| C | 4.01710000  | -2.51170000 | 0.00060000  |
| H | 4.61250000  | -5.86000000 | -0.00070000 |
| H | 5.80190000  | -3.71320000 | 0.00030000  |
| C | 3.98010000  | -0.08610000 | 0.00160000  |
| C | 4.67740000  | -1.26400000 | 0.00130000  |
| H | 5.76070000  | -1.24950000 | 0.00150000  |
| O | 4.60400000  | 1.12360000  | 0.00230000  |
| H | 5.56010000  | 0.99420000  | 0.00250000  |

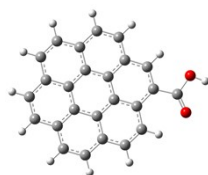

#### CDs-COOH

|   |             |             |             |
|---|-------------|-------------|-------------|
| C | -1.58570000 | -5.03680000 | -0.00070000 |
| C | -0.17170000 | -5.03030000 | -0.00060000 |
| C | 0.50340000  | -3.79130000 | -0.00030000 |
| C | -0.23030000 | -2.58020000 | -0.00010000 |
| C | -1.64120000 | -2.61740000 | -0.00030000 |
| C | -2.29330000 | -3.87250000 | -0.00050000 |
| C | 1.91890000  | -3.75510000 | -0.00010000 |
| C | 0.44950000  | -1.33550000 | 0.00030000  |
| C | 1.86880000  | -1.29240000 | 0.00070000  |
| C | 2.59550000  | -2.51030000 | 0.00040000  |
| C | 2.54300000  | -0.04680000 | 0.00140000  |
| C | 1.76470000  | 1.13430000  | 0.00140000  |
| C | 0.40200000  | 1.08890000  | 0.00090000  |
| C | -0.29520000 | -0.13800000 | 0.00040000  |
| C | -1.70840000 | -0.20240000 | 0.00010000  |
| C | -2.35880000 | -1.39890000 | -0.00020000 |
| H | -3.43910000 | -1.43670000 | -0.00040000 |
| H | -2.26430000 | 0.72450000  | 0.00010000  |
| H | -2.09710000 | -5.98910000 | -0.00080000 |
| H | -3.37420000 | -3.88950000 | -0.00060000 |
| H | 2.26840000  | 2.08580000  | 0.00180000  |
| H | -0.16870000 | 2.00680000  | 0.00090000  |
| C | 0.58960000  | -6.22150000 | -0.00090000 |
| C | 1.95230000  | -6.18760000 | -0.00090000 |
| C | 2.65380000  | -4.96040000 | -0.00050000 |
| H | 0.06610000  | -7.16730000 | -0.00110000 |
| H | 2.52220000  | -7.10610000 | -0.00110000 |
| C | 4.06760000  | -4.90220000 | -0.00040000 |
| C | 4.72090000  | -3.70790000 | 0.00020000  |
| C | 4.00620000  | -2.48550000 | 0.00060000  |
| H | 4.62130000  | -5.83050000 | -0.00080000 |
| H | 5.80090000  | -3.67150000 | 0.00030000  |
| C | 3.97470000  | -0.04840000 | 0.00200000  |
| C | 4.66110000  | -1.24230000 | 0.00150000  |
| H | 5.74040000  | -1.23220000 | 0.00190000  |
| C | 4.76780000  | 1.19950000  | 0.00290000  |
| O | 4.35260000  | 2.33440000  | 0.00380000  |
| O | 6.09790000  | 0.97260000  | 0.00370000  |

H 6.55860000 1.82600000 0.00480000

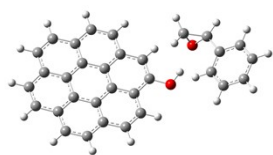

**CDs-OH-SO**

|   |                    |                   |                   |
|---|--------------------|-------------------|-------------------|
| C | 4.68345574284692   | -0.15436842027487 | 0.84326760148889  |
| C | 3.70366592519117   | -1.11881596267506 | 0.51223171221590  |
| C | 2.47763590177653   | -0.68268797178981 | -0.03227802453321 |
| C | 2.24612881207598   | 0.69915698020459  | -0.24301115966345 |
| C | 3.24307175789954   | 1.63903296616471  | 0.09321933199093  |
| C | 4.46108822251279   | 1.17495068697192  | 0.64148593642322  |
| C | 1.47646573009915   | -1.62704592494699 | -0.36888050738980 |
| C | 1.01434957793686   | 1.13726143161918  | -0.79054476756315 |
| C | 0.01114703193279   | 0.19244810346089  | -1.12192932840498 |
| C | 0.24439556951842   | -1.18870948221149 | -0.91009396146890 |
| C | -1.21341950437752  | 0.63651176623509  | -1.65925667811205 |
| C | -1.41633307112193  | 2.01879935191998  | -1.86631443289606 |
| C | -0.44847629224447  | 2.92520267944099  | -1.55061134991655 |
| C | 0.78797955249476   | 2.51361519221129  | -1.00328913134488 |
| C | 1.80665562320869   | 3.43347034664985  | -0.66006276680478 |
| C | 2.98901233393152   | 3.01230674626973  | -0.13028762766554 |
| H | 3.75806583533687   | 3.72684137160028  | 0.12868491006087  |
| H | 1.62642428923986   | 4.48634260668616  | -0.82726421538509 |
| H | 5.61989928560494   | -0.49472092921910 | 1.26306838361968  |
| H | 5.21911859906522   | 1.90138931280140  | 0.89972998939997  |
| H | -2.35948669529307  | 2.33667126976134  | -2.28380856437632 |
| H | -0.61406731402836  | 3.98078255781321  | -1.71457459257614 |
| C | 3.90898197849287   | -2.50460304744867 | 0.70754332719883  |
| C | 2.94699819766596   | -3.41292357084689 | 0.38073914288904  |
| C | 1.70767717432969   | -3.00365553559286 | -0.16309876937627 |
| H | 4.85160969543545   | -2.83176630192504 | 1.12382242700205  |
| H | 3.11796554667784   | -4.46947149928081 | 0.53447085173451  |
| C | 0.69004676370722   | -3.92272789407590 | -0.50848002851154 |
| C | -0.49745457279246  | -3.50027846754793 | -1.02660358734065 |
| C | -0.75635619859506  | -2.12608768143645 | -1.24079443809666 |
| H | 0.87345809093586   | -4.97674981637469 | -0.35175313085507 |
| H | -1.26611950683328  | -4.21492197647073 | -1.28599406705254 |
| C | -2.21228356855849  | -0.33030401455776 | -1.97578075962263 |
| C | -1.97923191862541  | -1.66493281488286 | -1.77018357969595 |
| H | -2.74947525237801  | -2.38298102174348 | -2.01942269580119 |
| O | -3.38741825663339  | 0.12177071905353  | -2.47652689386296 |
| H | -3.98875075418533  | -0.63423321536598 | -2.60812764288858 |
| C | -6.68182442997857  | -1.96276232222403 | -2.13521014974197 |
| C | -5.83085980796947  | -1.85025790031877 | -0.94125600431949 |
| H | -7.13279659890500  | -2.93389019238720 | -2.32858954681098 |
| H | -5.71611973006483  | -0.88402072585211 | -0.46464544011289 |
| H | -5.69247644451472  | -2.71046655301486 | -0.29725699729733 |
| O | -5.28015314713059  | -1.96004587584062 | -2.22282821277145 |
| C | -7.45086927958157  | -0.80672529989401 | -2.66114999661899 |
| C | -6.87896093060975  | 0.45410871768861  | -2.79070711126277 |
| C | -8.78061487558809  | -0.99295418681879 | -3.02275705231827 |
| C | -7.62933579667681  | 1.50911270951041  | -3.27812246040230 |
| H | -5.84513842030627  | 0.61329945451909  | -2.52478949389018 |
| C | -9.52824082871029  | 0.06599837123942  | -3.50397393911538 |
| H | -9.22898489586057  | -1.97123078305493 | -2.92422038639826 |
| C | -8.95341016980618  | 1.31939356626282  | -3.63438548796589 |
| H | -7.17481392865373  | 2.48339876024633  | -3.38072643816408 |
| H | -10.56008185161605 | -0.08840064539790 | -3.78134162903459 |
| H | -9.53589684629191  | 2.14477932516687  | -4.01554018660967 |

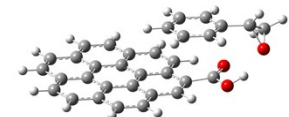

**CDs-COOH-SO**

|   |                   |                   |                   |
|---|-------------------|-------------------|-------------------|
| C | 5.33505117823089  | -0.37938249917927 | 0.46330797374858  |
| C | 4.34687794213561  | 0.61717391694093  | 0.28975381350555  |
| C | 3.03114836497323  | 0.22239142814061  | -0.03159842631122 |
| C | 2.71598669156348  | -1.15103484449604 | -0.17481288875830 |
| C | 3.72176032610627  | -2.12401019108085 | 0.00699620979384  |
| C | 5.03271982578863  | -1.70101532064657 | 0.32739128851774  |
| C | 2.02150992244383  | 1.19940229980238  | -0.21111636290427 |
| C | 1.39509652461999  | -1.54678757974315 | -0.50427866999775 |
| C | 0.38305590387294  | -0.57065040025697 | -0.69449303355033 |
| C | 0.70146721344980  | 0.80239465121873  | -0.53928815488349 |
| C | -0.92763050102523 | -0.96961482916293 | -1.04365201436875 |
| C | -1.20261890615134 | -2.35050080527400 | -1.17376918164939 |

|   |                    |                   |                   |
|---|--------------------|-------------------|-------------------|
| C | -0.23082010390882  | -3.28597388916454 | -0.97851686196336 |
| C | 1.09113670212411   | -2.91681759712528 | -0.64556876725331 |
| C | 2.11661247320281   | -3.87181418659805 | -0.45244646530780 |
| C | 3.38600715676514   | -3.48997394641896 | -0.13895440021630 |
| H | 4.16184879571219   | -4.22923257532359 | 0.00283326983062  |
| H | 1.87103339203640   | -4.91869596519715 | -0.56282736395031 |
| H | 6.34154017872166   | -0.07014868838062 | 0.70788419985032  |
| H | 5.79697682470954   | -2.45343713476886 | 0.46289058113216  |
| H | -2.20030133359800  | -2.65726203213256 | -1.44044137242180 |
| H | -0.46236577205451  | -4.33668013105551 | -1.08180399148403 |
| C | 4.63094113871157   | 1.99559456818058  | 0.42677148260914  |
| C | 3.65926326613564   | 2.93605200052459  | 0.25719224897252  |
| C | 2.33231652018126   | 2.56817179870550  | -0.06408802531687 |
| H | 5.64159650894488   | 2.29127337208374  | 0.67113245070722  |
| H | 3.89005427270609   | 3.98646857735337  | 0.36592314811245  |
| C | 1.30695003744524   | 3.52621735628165  | -0.24357793189662 |
| C | 0.03674677217708   | 3.14678055737184  | -0.55559488794493 |
| C | -0.29972581277743  | 1.78111911298414  | -0.71310149536496 |
| H | 1.55395176211158   | 4.57216076708223  | -0.12809374139614 |
| H | -0.73991092523031  | 3.88586494163943  | -0.69047853231381 |
| C | -1.91895462377075  | 0.04082752241277  | -1.22088648032491 |
| C | -1.60382129178965  | 1.36519058240969  | -1.04535770512485 |
| H | -2.36949171025905  | 2.11458457959935  | -1.18190784921805 |
| C | -3.30653843316930  | -0.29767820083482 | -1.62531775841728 |
| O | -3.617370914353994 | -1.21920166944052 | -2.34708232998406 |
| O | -4.20195723848219  | 0.54912846968775  | -1.12704839707456 |
| H | -5.12027078035380  | 0.27914581920596  | -1.38289631742625 |
| C | -6.88860710012639  | -1.78494416417539 | -1.31392705975774 |
| C | -6.71624315173685  | -1.42969547681610 | -2.72374068405426 |
| H | -7.89589893673190  | -2.01336231383502 | -0.96622477900372 |
| H | -5.75147650820321  | -1.60398589359454 | -3.18570903293641 |
| H | -7.57418715068762  | -1.41264808895119 | -3.38507739169441 |
| O | -6.71975390966902  | -0.44784210913468 | -1.71618580516126 |
| C | -5.78461424117678  | -2.43120991602824 | -0.54413864313454 |
| C | -5.25671035861817  | -1.80951358015413 | 0.57983410016869  |
| C | -5.27072490165004  | -3.65232188886971 | -0.96019333785795 |
| C | -4.20999871358068  | -2.39544811320123 | 1.26937790100543  |
| H | -5.65667089680294  | -0.85847327242382 | 0.90027462407075  |
| C | -4.23232760090304  | -4.24023085956938 | -0.26090621847107 |
| H | -5.67881302464043  | -4.13134693860885 | -1.83793088903605 |
| C | -3.69625289791648  | -3.61026894411347 | 0.85004385177348  |
| H | -3.79151218056333  | -1.89860046524062 | 2.13202872698449  |
| H | -3.83125738904186  | -5.18678172525242 | -0.59205653088764 |
| H | -2.87345843576807  | -4.06195118519697 | 1.38410248798922  |

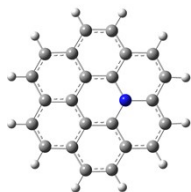

**CDs- graphitic N**

|   |             |             |             |
|---|-------------|-------------|-------------|
| C | -1.59970000 | -5.03100000 | -0.00070000 |
| C | -0.18210000 | -5.03700000 | -0.00060000 |
| C | 0.49900000  | -3.80820000 | -0.00020000 |
| C | -0.21500000 | -2.58500000 | 0.00000000  |
| C | -1.63350000 | -2.60590000 | -0.00030000 |
| C | -2.29520000 | -3.86520000 | -0.00050000 |
| C | 1.91470000  | -3.76540000 | -0.00010000 |
| C | 0.48230000  | -1.35730000 | 0.00040000  |
| C | 2.58630000  | -2.52350000 | 0.00040000  |
| C | 2.54710000  | -0.11320000 | 0.00130000  |
| C | 1.81080000  | 1.08080000  | 0.00140000  |
| C | 0.45060000  | 1.08980000  | 0.00090000  |
| C | -0.25150000 | -0.15510000 | 0.00050000  |
| C | -1.65240000 | -0.20130000 | 0.00010000  |
| C | -2.33370000 | -1.39480000 | -0.00020000 |
| H | -3.41340000 | -1.40850000 | -0.00040000 |
| H | -2.19190000 | 0.73420000  | 0.00020000  |
| H | -2.11680000 | -5.98020000 | -0.00080000 |
| H | -3.37570000 | -3.86810000 | -0.00060000 |
| H | 2.37080000  | 2.00360000  | 0.00180000  |
| H | -0.11120000 | 2.00930000  | 0.00100000  |
| C | 0.57430000  | -6.23600000 | -0.00090000 |
| C | 1.93150000  | -6.20800000 | -0.00090000 |
| C | 2.64870000  | -4.97950000 | -0.00050000 |
| H | 0.04340000  | -7.17750000 | -0.00110000 |
| H | 2.50170000  | -7.12580000 | -0.00110000 |
| C | 4.04690000  | -4.93140000 | -0.00040000 |
| C | 4.69790000  | -3.72110000 | 0.00020000  |
| C | 3.99470000  | -2.50860000 | 0.00060000  |
| H | 4.60740000  | -5.85430000 | -0.00080000 |
| H | 5.77720000  | -3.68280000 | 0.00030000  |

|   |            |             |            |
|---|------------|-------------|------------|
| C | 4.67820000 | -1.25350000 | 0.00140000 |
| H | 5.75570000 | -1.24240000 | 0.00170000 |
| C | 3.94960000 | -0.10470000 | 0.00170000 |
| H | 4.43560000 | 0.85900000  | 0.00230000 |
| N | 1.86480000 | -1.34400000 | 0.00070000 |

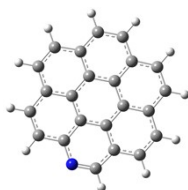

**CDs- pyridinic N**

|   |             |             |             |
|---|-------------|-------------|-------------|
| C | -1.60370000 | -5.03680000 | -0.00070000 |
| C | -0.18870000 | -5.04690000 | -0.00060000 |
| C | 0.49410000  | -3.81340000 | -0.00030000 |
| C | -0.23250000 | -2.59650000 | -0.00010000 |
| C | -1.64210000 | -2.61450000 | -0.00030000 |
| C | -2.30290000 | -3.86580000 | -0.00050000 |
| C | 1.90950000  | -3.79490000 | -0.00020000 |
| C | 0.45500000  | -1.35860000 | 0.00030000  |
| C | 1.86720000  | -1.34530000 | 0.00060000  |
| C | 2.59150000  | -2.55710000 | 0.00030000  |
| C | 2.57940000  | -0.12790000 | 0.00110000  |
| C | 1.84570000  | 1.08200000  | 0.00130000  |
| C | 0.48100000  | 1.07000000  | 0.00100000  |
| C | -0.25380000 | -0.14070000 | 0.00050000  |
| C | -1.66790000 | -0.18940000 | 0.00020000  |
| C | -2.33430000 | -1.37990000 | -0.00020000 |
| H | -3.41520000 | -1.39800000 | -0.00040000 |
| H | -2.21640000 | 0.74210000  | 0.00020000  |
| H | -2.12560000 | -5.98340000 | -0.00090000 |
| H | -3.38400000 | -3.87680000 | -0.00060000 |
| H | 2.39970000  | 2.00790000  | 0.00170000  |
| H | -0.06840000 | 2.00120000  | 0.00110000  |
| C | 0.57170000  | -6.24040000 | -0.00090000 |
| C | 1.93600000  | -6.21790000 | -0.00080000 |
| C | 2.64760000  | -4.99510000 | -0.00050000 |
| H | 0.04440000  | -7.18430000 | -0.00110000 |
| H | 2.49650000  | -7.14220000 | -0.00110000 |
| C | 4.06280000  | -4.92230000 | -0.00030000 |
| C | 4.71830000  | -3.72540000 | 0.00020000  |
| C | 3.99900000  | -2.50800000 | 0.00060000  |
| H | 4.62210000  | -5.84760000 | -0.00070000 |
| H | 5.79850000  | -3.68980000 | 0.00030000  |
| C | 4.59190000  | -1.21920000 | 0.00120000  |
| H | 5.67240000  | -1.13050000 | 0.00150000  |
| N | 3.93290000  | -0.09830000 | 0.00150000  |

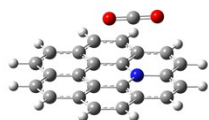

**CDs- graphitic N-CO<sub>2</sub>**

|   |             |             |             |
|---|-------------|-------------|-------------|
| C | -1.58840000 | -5.01100000 | 0.00290000  |
| C | -0.17100000 | -5.01670000 | -0.01580000 |
| C | 0.50960000  | -3.78890000 | -0.05220000 |
| C | -0.20460000 | -2.56610000 | -0.06830000 |
| C | -1.62260000 | -2.58690000 | -0.04200000 |
| C | -2.28420000 | -3.84540000 | -0.00870000 |
| C | 1.92510000  | -3.74650000 | -0.06810000 |
| C | 0.49130000  | -1.33880000 | -0.10600000 |
| C | 2.59700000  | -2.50590000 | -0.10580000 |
| C | 2.55750000  | -0.09400000 | -0.16840000 |
| C | 1.82090000  | 1.09890000  | -0.17930000 |
| C | 0.46090000  | 1.10780000  | -0.15000000 |
| C | -0.24120000 | -0.13640000 | -0.11230000 |
| C | -1.64210000 | -0.18240000 | -0.08190000 |
| C | -2.32280000 | -1.37540000 | -0.04860000 |
| H | -3.40220000 | -1.38880000 | -0.02720000 |
| H | -2.18140000 | 0.75310000  | -0.08630000 |
| H | -2.10520000 | -5.95980000 | 0.02870000  |
| H | -3.36450000 | -3.84800000 | 0.00790000  |
| H | 2.38010000  | 2.02130000  | -0.20780000 |
| H | -0.10110000 | 2.02710000  | -0.15510000 |
| C | 0.58510000  | -6.21570000 | 0.00310000  |
| C | 1.94230000  | -6.18800000 | -0.00820000 |
| C | 2.65890000  | -4.95990000 | -0.04150000 |
| H | 0.05440000  | -7.15680000 | 0.02900000  |

|   |           |            |            |
|---|-----------|------------|------------|
| H | 2.5126000 | -7.1055000 | 0.0086000  |
| C | 4.0573000 | -4.9116000 | -0.0479000 |
| C | 4.7082000 | -3.7021000 | -0.0812000 |
| C | 4.0048000 | -2.4898000 | -0.1118000 |
| H | 4.6180000 | -5.8341000 | -0.0263000 |
| H | 5.7874000 | -3.6637000 | -0.0854000 |
| C | 4.6878000 | -1.2350000 | -0.1495000 |
| H | 5.7652000 | -1.2243000 | -0.1544000 |
| C | 3.9595000 | -0.0864000 | -0.1791000 |
| H | 4.4453000 | 0.8766000  | -0.2075000 |
| N | 1.8750000 | -1.3254000 | -0.1300000 |
| C | 1.8055000 | -1.4509000 | 2.8480000  |
| O | 1.2538000 | -2.4529000 | 2.8702000  |
| O | 2.3584000 | -0.4493000 | 2.8330000  |

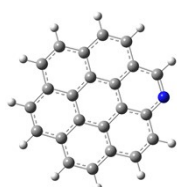

#### CDs- pyridinic N-CO<sub>2</sub>

|   |            |            |            |
|---|------------|------------|------------|
| C | -1.6308000 | -5.0939000 | -0.0012000 |
| C | -0.2158000 | -5.0877000 | -0.0009000 |
| C | 0.4527000  | -3.8464000 | -0.0003000 |
| C | -0.2873000 | -2.6377000 | -0.0001000 |
| C | -1.6966000 | -2.6722000 | -0.0005000 |
| C | -2.3432000 | -3.9311000 | -0.0010000 |
| C | 1.8676000  | -3.8115000 | 0.0000000  |
| C | 0.3860000  | -1.3918000 | 0.0004000  |
| C | 1.7985000  | -1.3613000 | 0.0008000  |
| C | 2.5350000  | -2.5657000 | 0.0005000  |
| C | 2.4956000  | -0.1347000 | 0.0013000  |
| C | 1.7473000  | 1.0667000  | 0.0016000  |
| C | 0.3828000  | 1.0361000  | 0.0012000  |
| C | -0.3377000 | -0.1830000 | 0.0006000  |
| C | -1.7512000 | -0.2480000 | 0.0002000  |
| C | -2.4035000 | -1.4461000 | -0.0003000 |
| H | -3.4841000 | -1.4770000 | -0.0006000 |
| H | -2.3104000 | 0.6770000  | 0.0004000  |
| H | -2.1415000 | -6.0466000 | -0.0016000 |
| H | -3.4239000 | -3.9544000 | -0.0013000 |
| H | 2.2854000  | 2.0008000  | 0.0021000  |
| H | -0.1778000 | 1.9604000  | 0.0014000  |
| C | 0.5582000  | -6.2724000 | -0.0010000 |
| C | 1.9222000  | -6.2340000 | -0.0007000 |
| C | 2.6195000  | -5.0032000 | -0.0002000 |
| H | 0.0420000  | -7.2223000 | -0.0014000 |
| H | 2.4936000  | -7.1515000 | -0.0009000 |
| C | 4.0341000  | -4.9151000 | 0.0001000  |
| C | 4.6761000  | -3.7113000 | 0.0006000  |
| C | 3.9418000  | -2.5023000 | 0.0008000  |
| H | 4.6032000  | -5.8342000 | 0.0000000  |
| H | 5.7555000  | -3.6617000 | 0.0009000  |
| C | 4.5220000  | -1.2103000 | 0.0013000  |
| H | 5.6012000  | -1.1096000 | 0.0015000  |
| N | 3.8506000  | -0.0948000 | 0.0016000  |
| C | 5.4481000  | 1.9084000  | 0.0031000  |
| O | 6.3613000  | 1.2159000  | -0.0008000 |
| O | 4.6127000  | 2.6929000  | 0.0068000  |

## 2. Characterization of Compounds

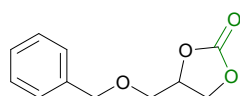

2a

The residue was purified by column chromatography on silica gel with petroleum ether/ethyl acetate (4/1) to afford the product **1** as light-yellow oil. (989.0 mg, 95% yield). Known compound<sup>1</sup>. <sup>1</sup>H NMR (500 MHz, CDCl<sub>3</sub>) δ 7.39-7.29 (m, 5H), 4.84-4.79 (m, 1H), 4.60 (dd, *J* = 12.0, 27.0 Hz, 2H), 4.48 (t, *J* = 8.0 Hz, 1H), 4.39 (dd, *J* = 6.0,

8.5 Hz, 1H), 3.71 (dd,  $J = 4.0, 11.0$  Hz, 1H), 3.62 (dd,  $J = 3.5, 11.0$  Hz, 1H).  $^{13}\text{C}$  NMR (125 MHz,  $\text{CDCl}_3$ )  $\delta$  155.05, 137.14, 128.69, 128.20, 127.87, 75.09, 73.80, 68.91, 66.40.

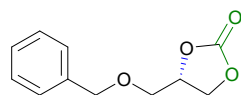

(S)-2a

The residue was purified by column chromatography on silica gel with petroleum ether/ethyl acetate (4/1) to afford the product **2** as light-yellow oil. (926.5 mg, 89% yield, 99% e.e.). Known compound<sup>1</sup>.  $^1\text{H}$  NMR (500 MHz,  $\text{CDCl}_3$ )  $\delta$  7.39-7.29 (m, 5H), 4.84-4.79 (m, 1H), 4.60 (dd,  $J = 12.0, 27.0$  Hz, 2H), 4.48 (t,  $J = 8.0$  Hz, 1H), 4.39 (dd,  $J = 6.0, 8.5$  Hz, 1H), 3.71 (dd,  $J = 4.0, 11.0$  Hz, 1H), 3.62 (dd,  $J = 3.5, 11.0$  Hz, 1H).  $^{13}\text{C}$  NMR (125 MHz,  $\text{CDCl}_3$ )  $\delta$  155.05, 137.14, 128.70, 128.21, 127.88, 75.09, 73.81, 68.91, 66.41. HPLC: (OD-H, 0.46\*25 cm, 5  $\mu\text{m}$ , hexane/isopropanol = 90/10, flow 1.0 mL/min, detection at 214 nm) retention time = 35.95 min (major) and 51.55 min (minor).

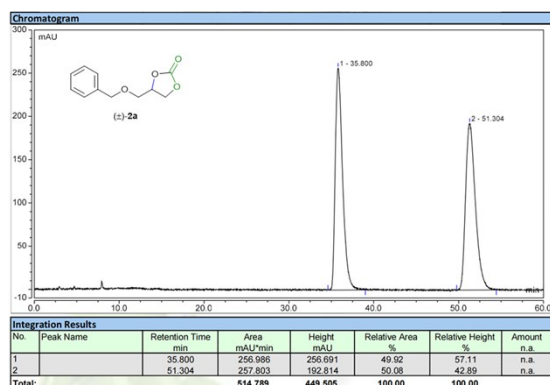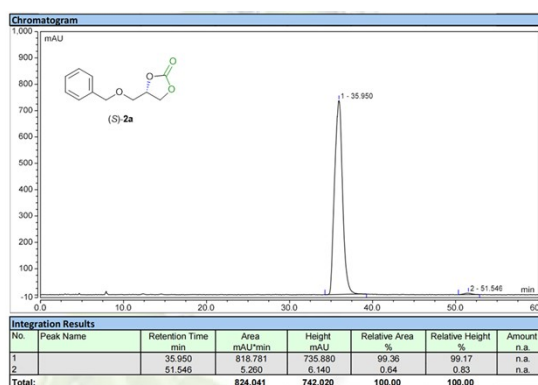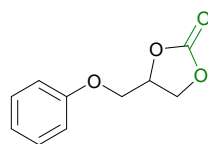

2b

The residue was purified by column chromatography on silica gel with petroleum ether/ethyl acetate (4/1) to afford the product **3** as white solid. (893.3 mg, 92% yield). Known compound<sup>1</sup>.  $^1\text{H}$  NMR (500 MHz,  $\text{CDCl}_3$ )  $\delta$  7.34-7.28 (m, 2H), 7.02 (t,  $J = 15.0$

Hz, 1H), 6.91 (d,  $J = 8.0$  Hz, 2H), 5.06-5.01 (m, 1H), 4.62 (t,  $J = 8.5$  Hz, 1H), 4.55 (dd,  $J = 5.5, 8.5$  Hz, 1H), 4.24 (dd,  $J = 4.5, 11.0$  Hz, 1H), 4.15 (dd,  $J = 4.0, 10.5$  Hz, 1H).  $^{13}\text{C}$  NMR (125 MHz,  $\text{CDCl}_3$ )  $\delta$  157.85, 154.76, 129.84, 122.15, 114.72, 74.19, 66.97, 66.39.

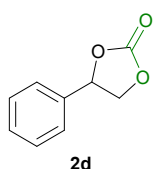

The residue was purified by column chromatography on silica gel with petroleum ether/ethyl acetate (3/1) to afford the product **4** as white solid. (722.3 mg, 88% yield). Known compound<sup>1</sup>.  $^1\text{H}$  NMR (500 MHz,  $\text{CDCl}_3$ )  $\delta$  7.48-7.40 (m, 3H), 7.38-7.35 (m, 2H), 5.68 (t,  $J = 8.0$  Hz, 1H), 4.81 (t,  $J = 8.5$  Hz, 1H), 4.36 (dd,  $J = 8.0, 8.5$  Hz, 1H).  $^{13}\text{C}$  NMR (125 MHz,  $\text{CDCl}_3$ )  $\delta$  154.94, 135.90, 129.89, 129.39, 126.00, 78.13, 71.31.

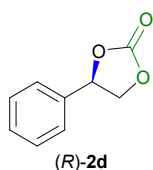

The residue was purified by column chromatography on silica gel with petroleum ether/ethyl acetate (3/1) to afford the product **4** as white solid. (574.6 mg, 70% yield, 94% e.e.). Known compound<sup>1</sup>.  $^1\text{H}$  NMR (500 MHz,  $\text{CDCl}_3$ )  $\delta$  7.48-7.41 (m, 3H), 7.38-7.35 (m, 2H), 5.68 (t,  $J = 8.0$  Hz, 1H), 4.81 (t,  $J = 8.5$  Hz, 1H), 4.35 (dd,  $J = 8.0, 8.5$  Hz, 1H).  $^{13}\text{C}$  NMR (125 MHz,  $\text{CDCl}_3$ )  $\delta$  154.93, 135.90, 129.90, 129.39, 126.00, 78.13, 71.31. HPLC: (OD-H, 0.46\*25 cm, 5  $\mu\text{m}$ , hexane/isopropanol = 90/10, flow 1.0 mL/min, detection at 214 nm) retention time = 12.40 min (major) and 15.15 min (minor).



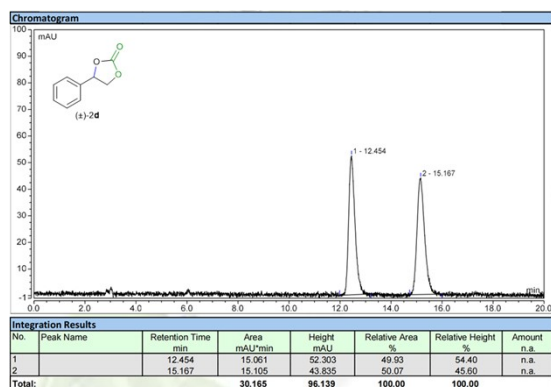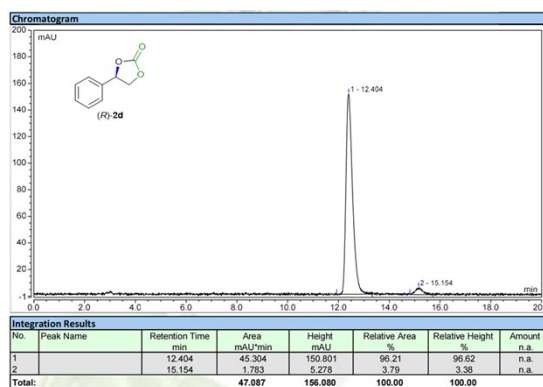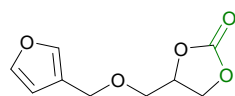

2c

The residue was purified by column chromatography on silica gel with petroleum ether/ethyl acetate (3/1) to afford the product **6** as yellow oil. (832.3 mg, 84% yield). Known compound<sup>1</sup>. <sup>1</sup>H NMR (500 MHz, CDCl<sub>3</sub>) δ 7.48-7.41 (m, 3H), 7.38-7.35 (m, 2H), 5.68 (t, *J* = 8.0 Hz, 1H), 4.81 (t, *J* = 8.5 Hz, 1H), 4.35 (dd, *J* = 8.0, 8.5 Hz, 1H). <sup>13</sup>C NMR (125 MHz, CDCl<sub>3</sub>) δ 154.98, 150.76, 143.31, 110.35, 110.26, 74.97, 68.58, 66.39, 65.41.

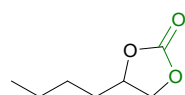

2e

The residue was purified by column chromatography on silica gel with petroleum ether/ethyl acetate (4/1) to afford the product **7** as colorless oil. (605.5 mg, 84% yield). Known compound<sup>1</sup>. <sup>1</sup>H NMR (500 MHz, CDCl<sub>3</sub>) δ 4.73-4.66 (m, 1H), 4.52 (t, *J* = 8.0 Hz, 1H), 4.06 (dd, *J* = 7.5, 8.5 Hz, 1H), 1.84-1.76 (m, 1H), 1.72-1.64 (m, 1H), 1.48-1.41 (m, 1H), 1.40-1.31 (m, 3H), 0.91 (t, *J* = 7.0 Hz, 3H). <sup>13</sup>C NMR (125 MHz, CDCl<sub>3</sub>) δ 155.24, 77.19, 69.52, 33.68, 26.55, 22.37, 13.93.

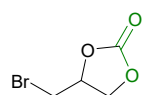

2i

The residue was purified by column chromatography on silica gel with petroleum ether/ethyl acetate (3/1) to afford the product **8** as colorless oil. (696.8 mg, 77% yield). Known compound<sup>1</sup>. <sup>1</sup>H NMR (500 MHz, CDCl<sub>3</sub>) δ 4.98-4.93 (m, 1H), 4.58 (t, *J* = 8.5 Hz, 1H), 4.33 (dd, *J* = 6.0, 9.0 Hz, 1H), 3.62-3.54 (m, 2H). <sup>13</sup>C NMR (125 MHz, CDCl<sub>3</sub>) δ 154.33, 74.09, 68.16, 31.76.

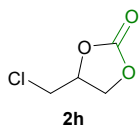

The residue was purified by column chromatography on silica gel with petroleum ether/ethyl acetate (1/1) to afford the product **9** as colorless oil. (580.3 mg, 85% yield). Known compound<sup>1</sup>. <sup>1</sup>H NMR (500 MHz, CDCl<sub>3</sub>) δ 4.99-4.94 (m, 1H), 4.61-4.57 (m, 1H), 4.43-4.40 (m, 1H), 3.78 (dd, *J* = 5.5, 12.0 Hz, 1H), 3.73 (dd, *J* = 3.5, 12.0 Hz, 1H). <sup>13</sup>C NMR (125 MHz, CDCl<sub>3</sub>) δ 154.25, 74.34, 67.09, 43.74.

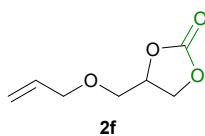

The residue was purified by column chromatography on silica gel with petroleum ether/ethyl acetate (3/1) to afford the product **10** as colorless oil. (664.2 mg, 84% yield). Known compound<sup>1</sup>. <sup>1</sup>H NMR (500 MHz, CDCl<sub>3</sub>) δ 5.84-5.76 (m, 1H), 5.23-5.12 (m, 2H), 4.81-4.76 (m, 1H), 4.45 (t, *J* = 8.0 Hz, 1H), 4.32 (dd, *J* = 6.5, 8.5 Hz, 1H), 4.02-3.94 (m, 2H), 3.64 (dd, *J* = 3.5, 11.0 Hz, 1H), 3.54 (dd, *J* = 3.5, 11.0 Hz, 1H). <sup>13</sup>C NMR (125 MHz, CDCl<sub>3</sub>) δ 155.05, 133.69, 117.57, 128.20, 75.19, 72.33, 68.80, 66.16.

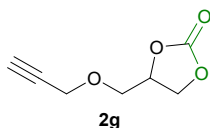

The residue was purified by column chromatography on silica gel with petroleum ether/ethyl acetate (1/2) to afford the product **11** as colorless oil. (663.6 mg, 85% yield). Known compound<sup>1</sup>. <sup>1</sup>H NMR (500 MHz, CDCl<sub>3</sub>) δ 4.86-4.81 (m, 1H), 4.48 (t, *J* = 8.5

Hz, 1H), 4.35 (dd,  $J = 6.0, 8.5$  Hz, 1H), 4.24-4.13 (m, 2H), 3.75 (dd,  $J = 3.5, 11.0$  Hz, 1H), 3.67 (dd,  $J = 3.5, 11.0$  Hz, 1H), 2.48 (t,  $J = 2$  Hz, 1H).  $^{13}\text{C}$  NMR (125 MHz,  $\text{CDCl}_3$ )  $\delta$  154.97, 78.61, 75.61, 74.87, 68.45, 66.16, 58.75.

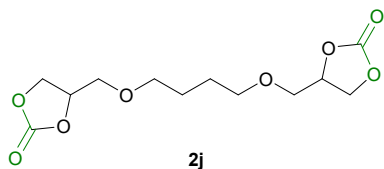

The residue was purified by column chromatography on silica gel with petroleum ether/ethyl acetate (1/1) to afford the product **12** as colorless oil. (1132.1 mg, 78% yield). Known compound<sup>2</sup>.  $^1\text{H}$  NMR (500 MHz,  $\text{CDCl}_3$ )  $\delta$  4.83-4.78 (m, 1H), 4.49 (t,  $J = 8.5$  Hz, 1H), 4.40-4.36 (m, 1H), 3.68 (dd,  $J = 3.5, 11.0$  Hz, 1H), 3.59-3.55 (m, 1H), 3.52 (t,  $J = 6$  Hz, 2H), 1.64-1.62 (m, 2H).  $^{13}\text{C}$  NMR (125 MHz,  $\text{CDCl}_3$ )  $\delta$  155.19, 75.31, 71.67, 69.72, 66.31, 26.12.

### 3. NMR Spectra

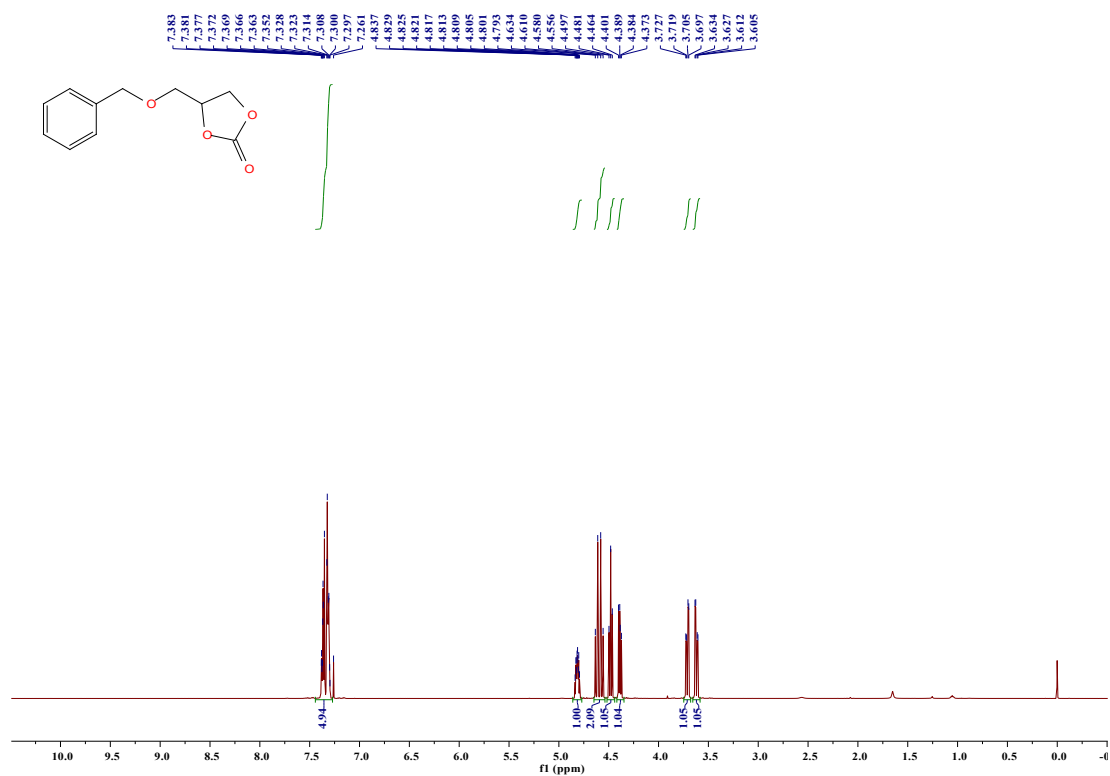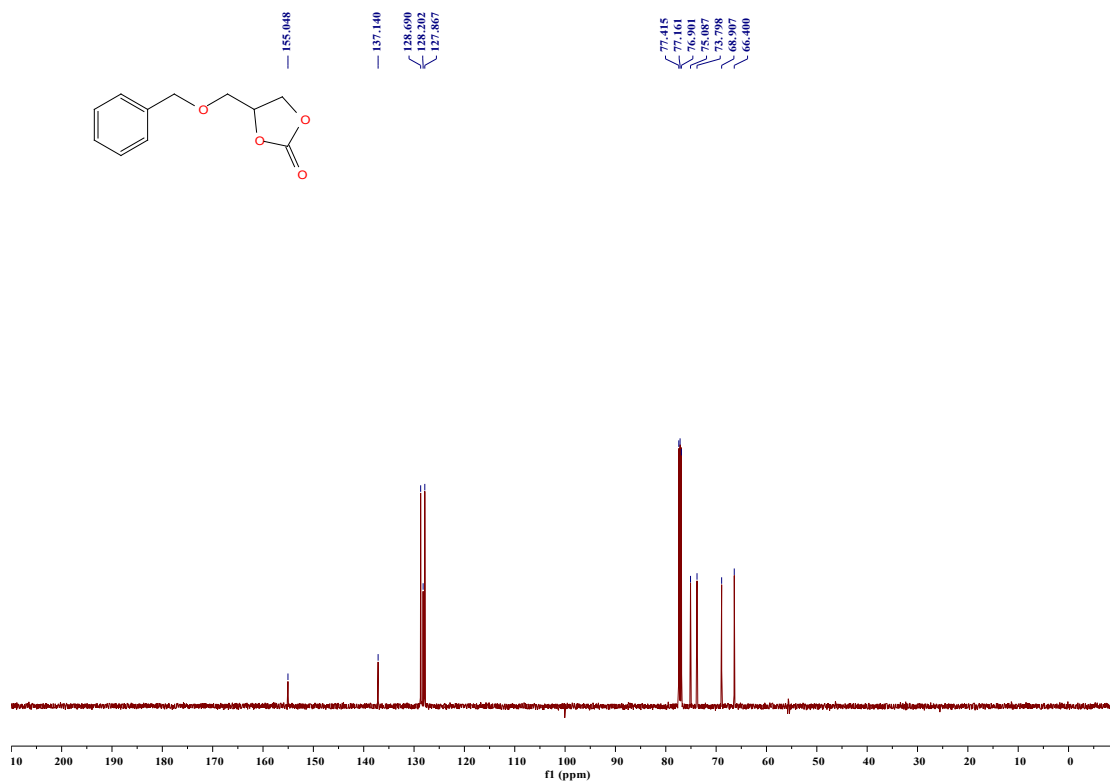

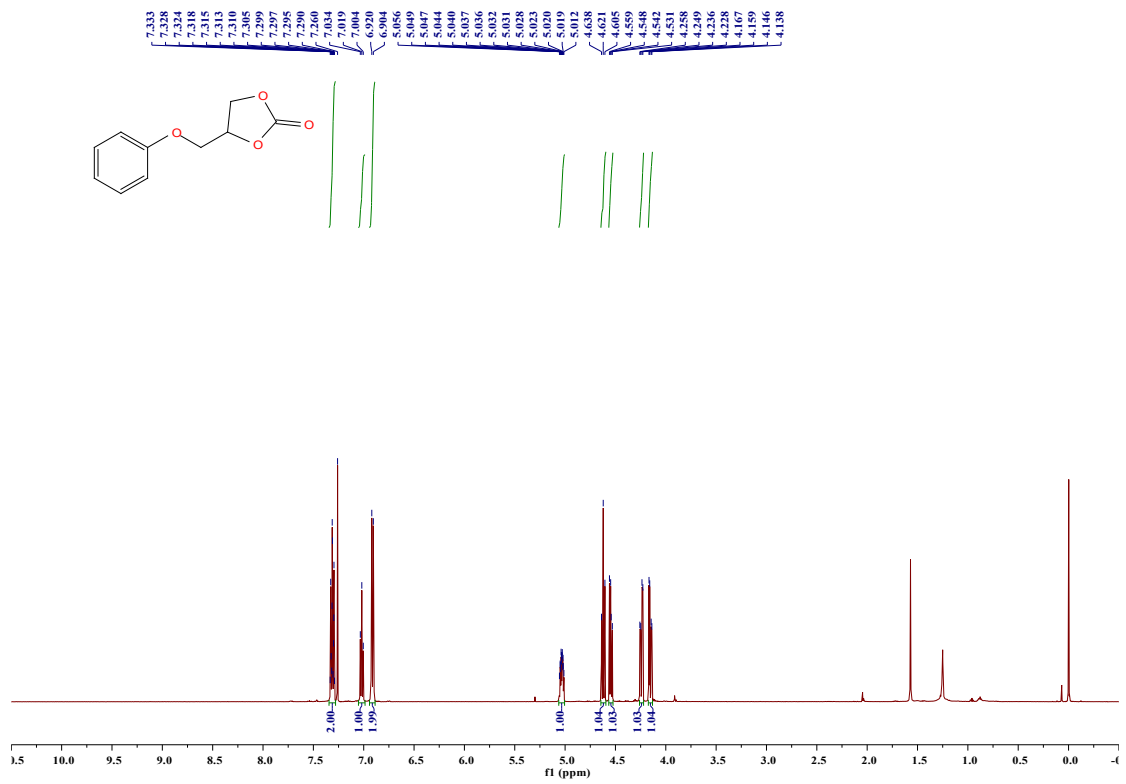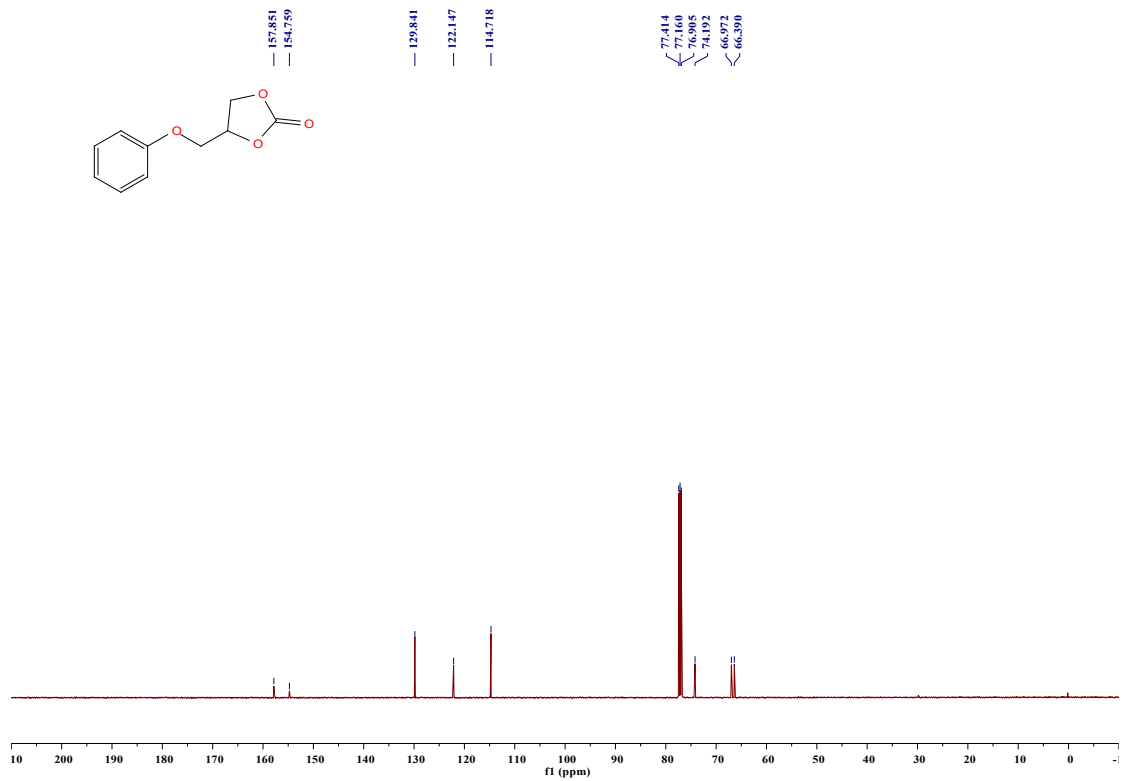

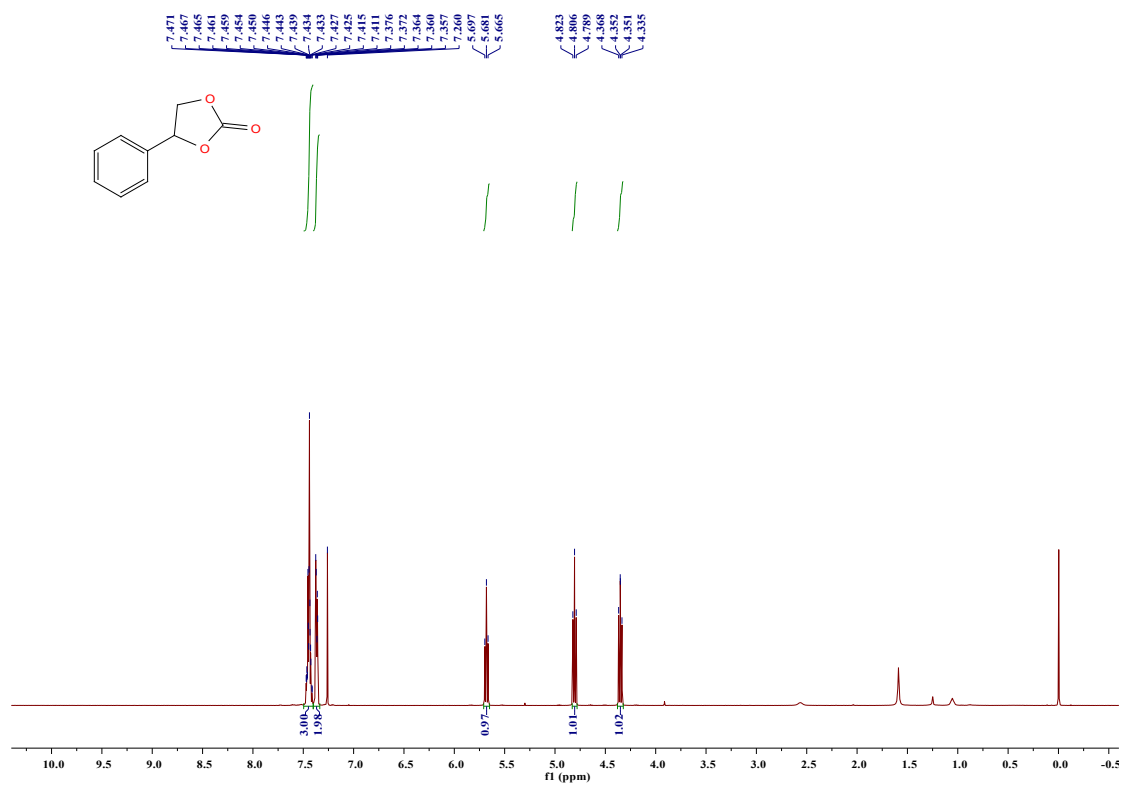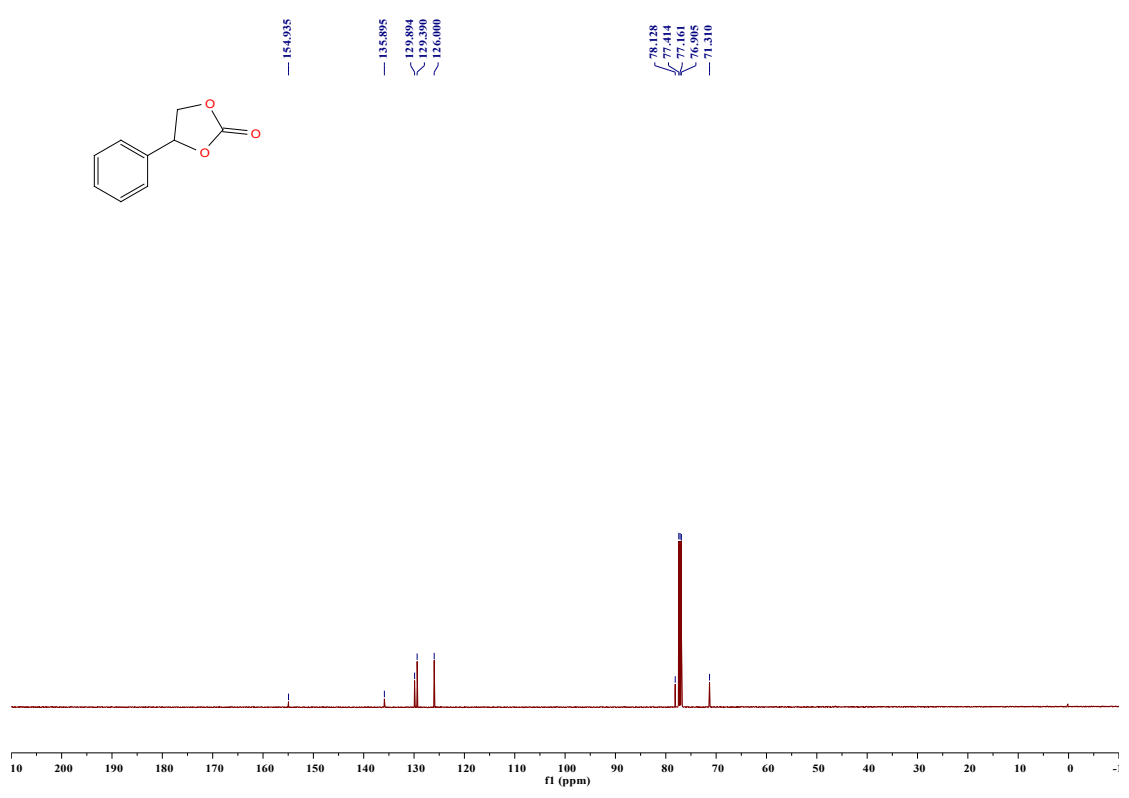

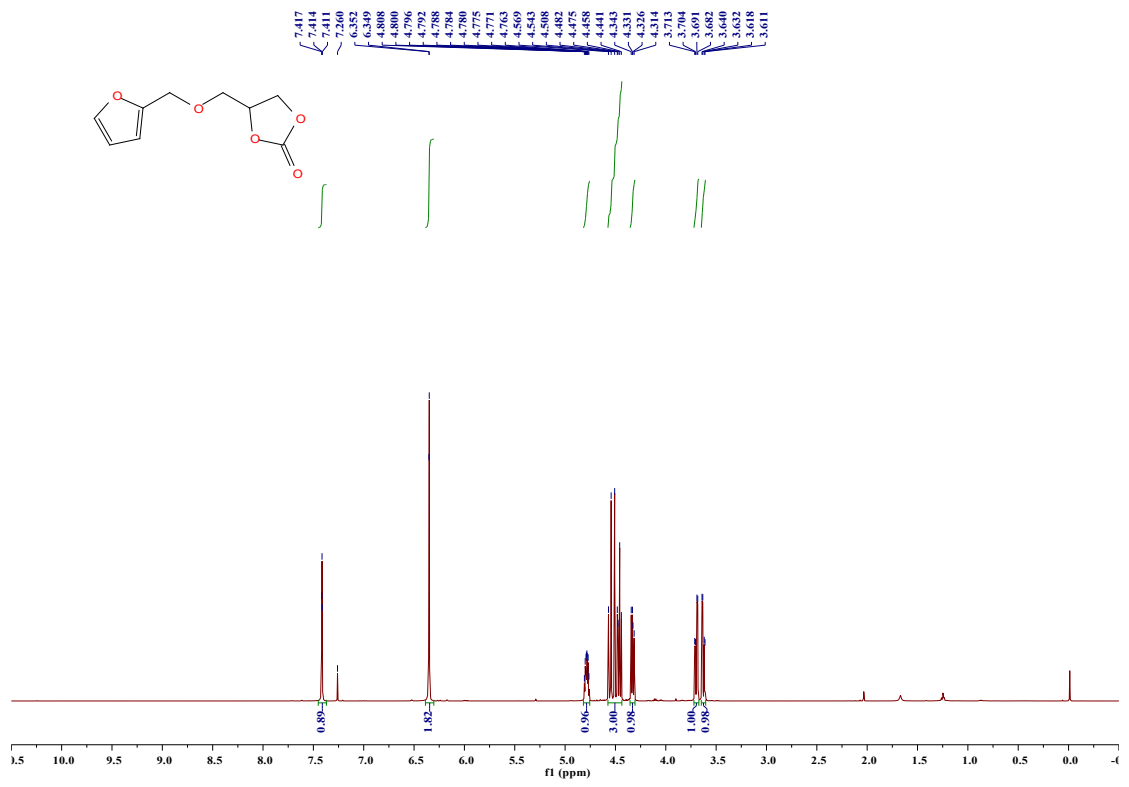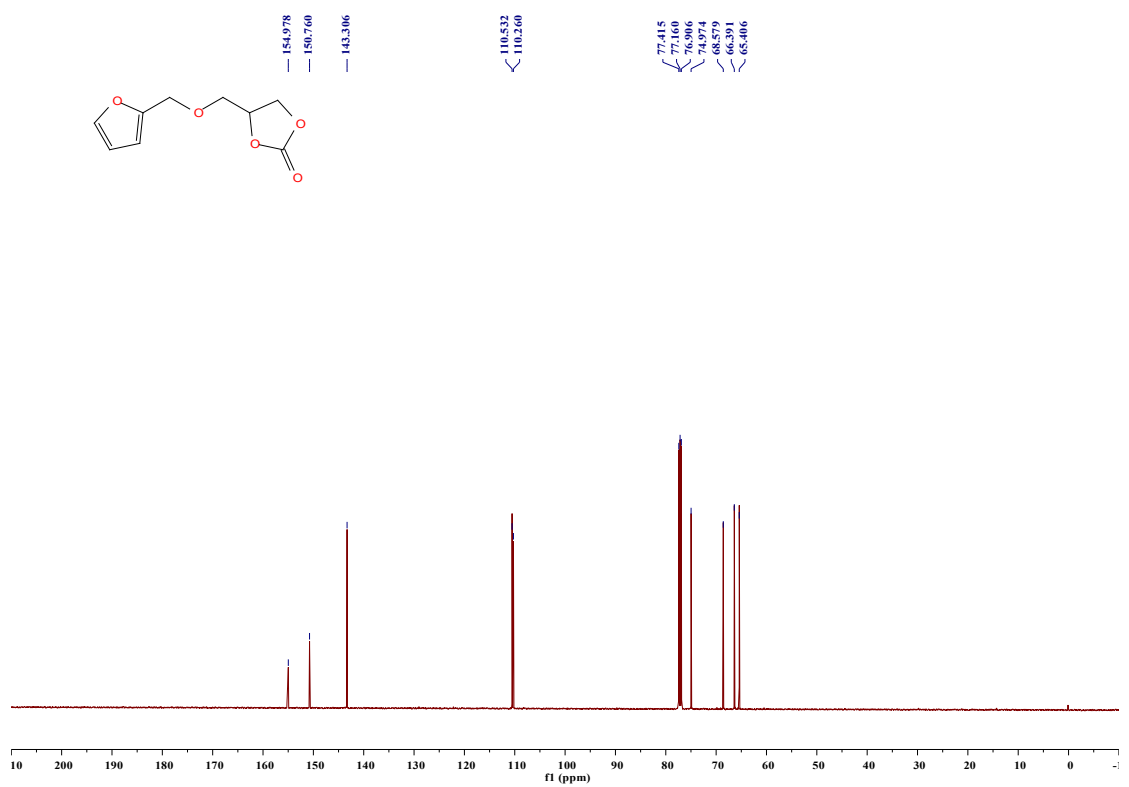

7.260  
4.725  
4.716  
4.710  
4.699  
4.694  
4.684  
4.679  
4.669  
4.656  
4.576  
4.504  
4.078  
4.063  
4.061  
4.046  
1.977  
1.877  
1.812  
1.808  
1.806  
1.802  
1.799  
1.793  
1.789  
1.789  
1.784  
1.779  
1.774  
1.763  
1.712  
1.691  
1.691  
1.686  
1.686  
1.683  
1.681  
1.677  
1.673  
1.663  
1.663  
1.653  
1.476  
1.465  
1.460  
1.458  
1.448  
1.448  
1.441  
1.439  
1.437  
1.435  
1.432  
1.429  
1.429  
1.424  
1.424  
1.422  
1.417  
1.410  
1.389  
1.389  
1.386  
1.377  
1.372  
1.368  
1.367  
1.363  
1.358  
1.350  
1.350  
1.345  
1.340  
1.337  
1.332  
1.330  
1.326  
1.321  
1.321  
0.928  
0.914  
0.900

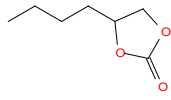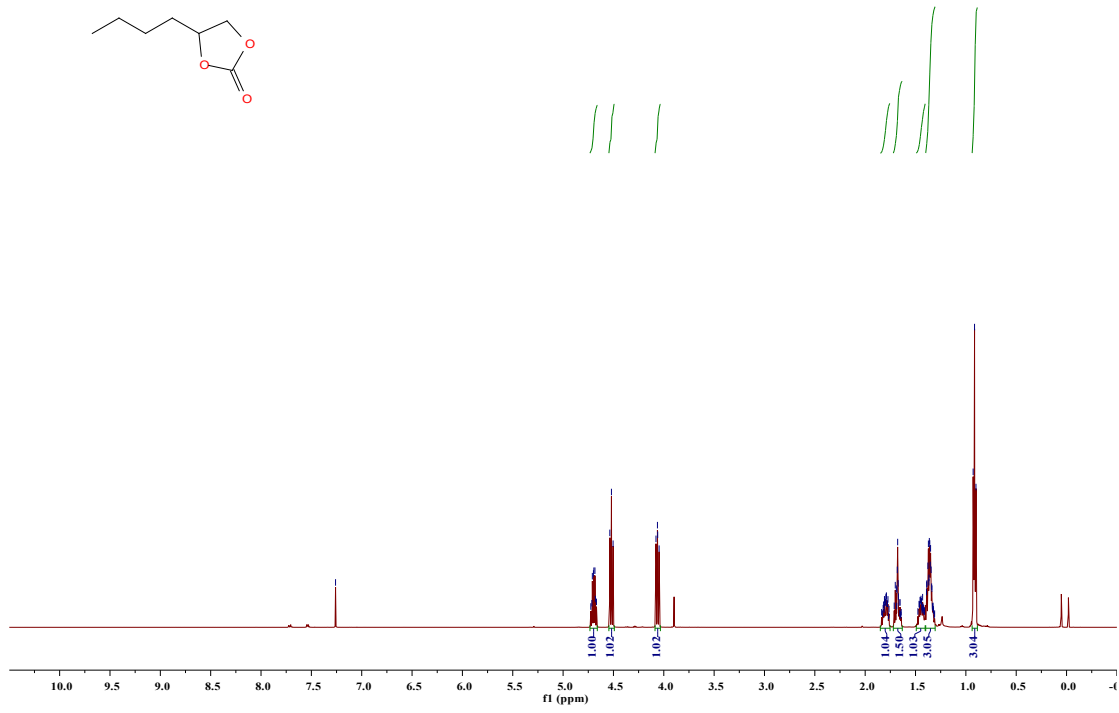

155.236  
77.414  
77.188  
77.160  
76.905  
69.520  
33.680  
26.548  
22.372  
13.925

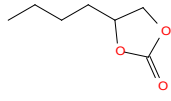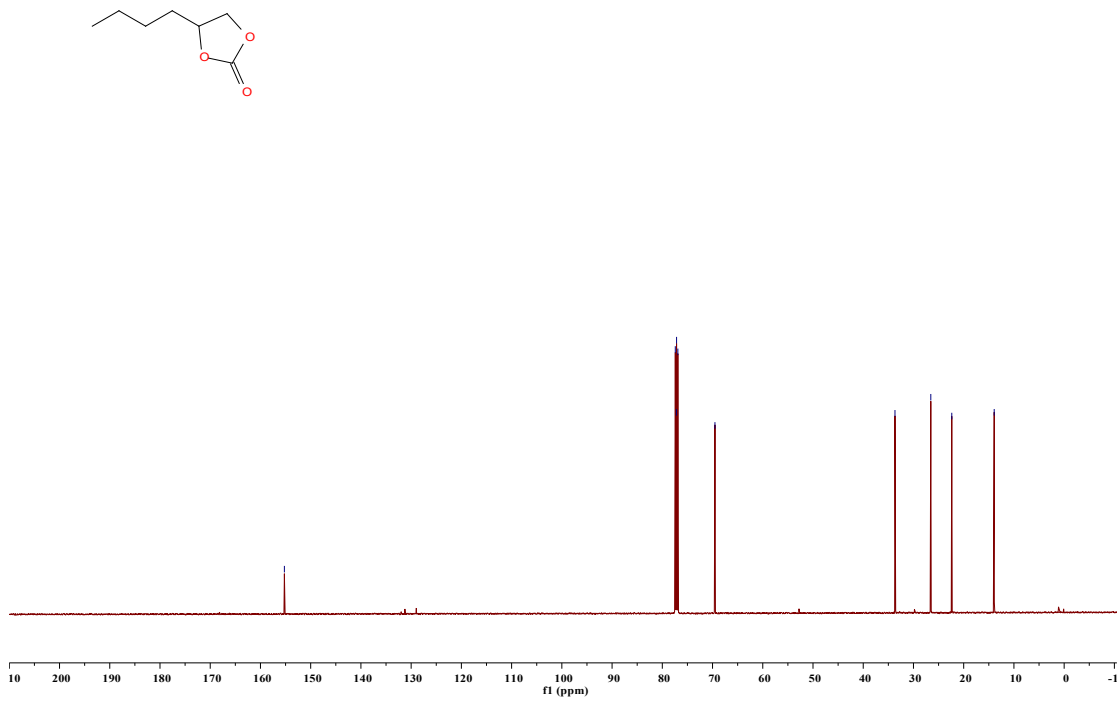



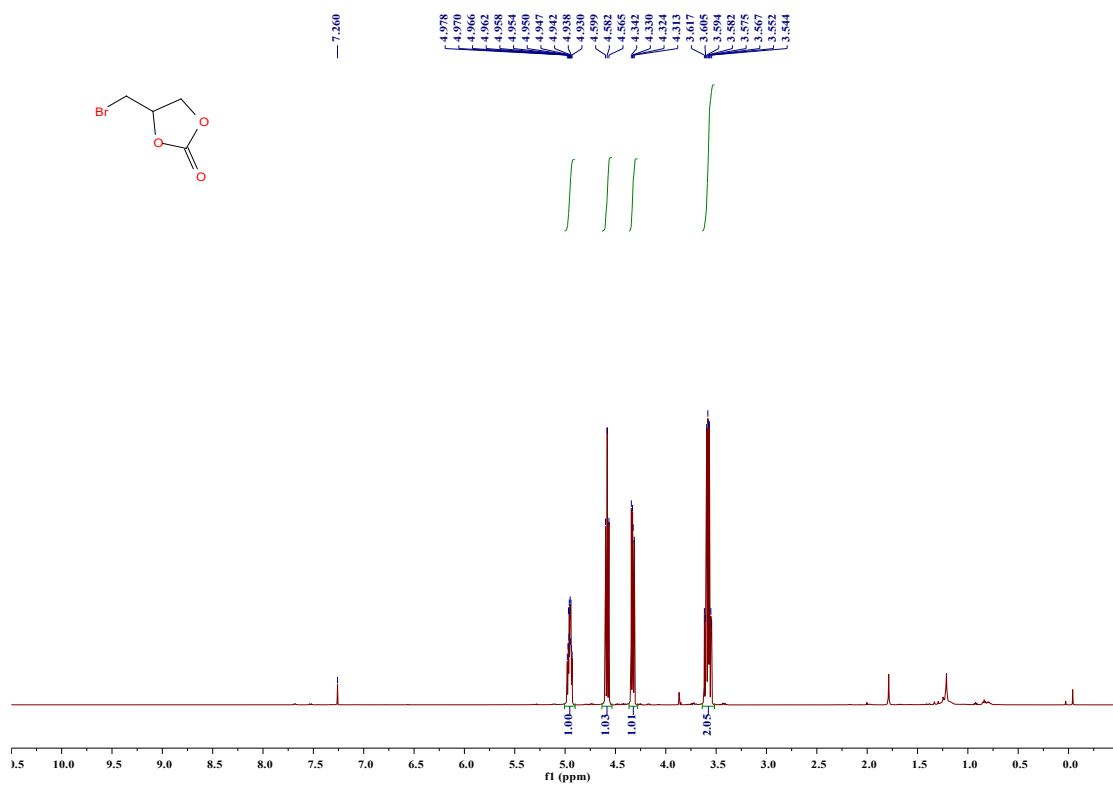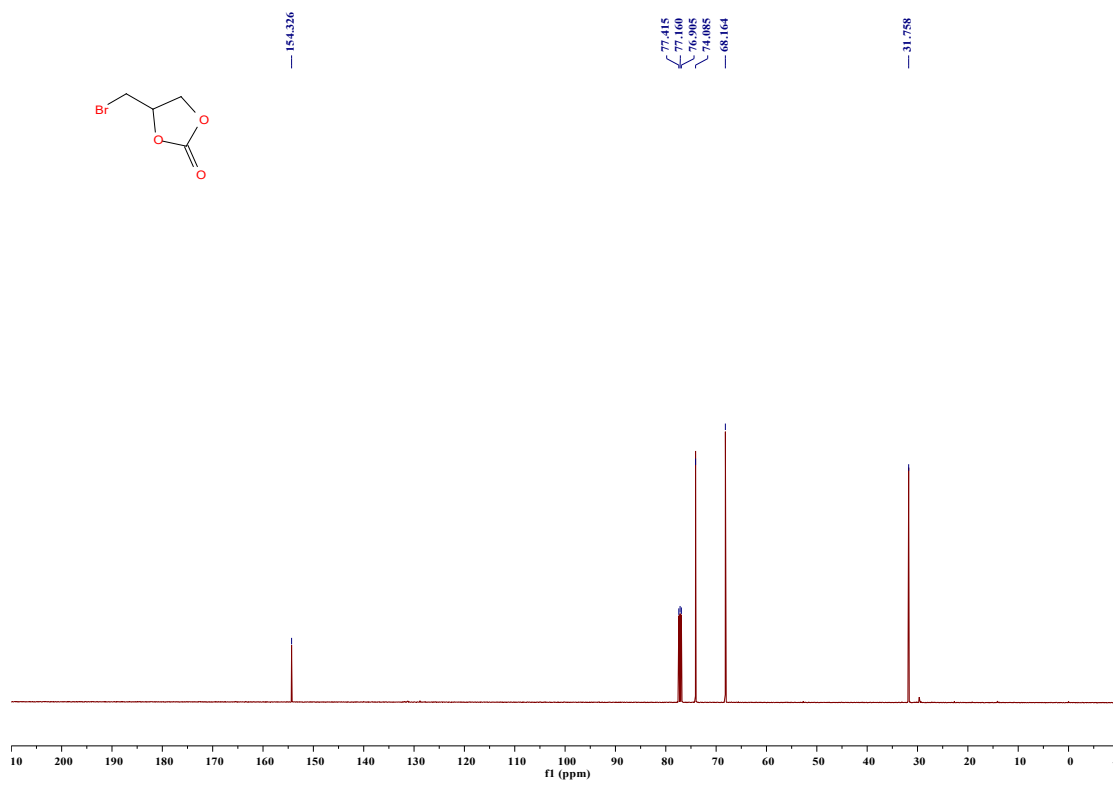

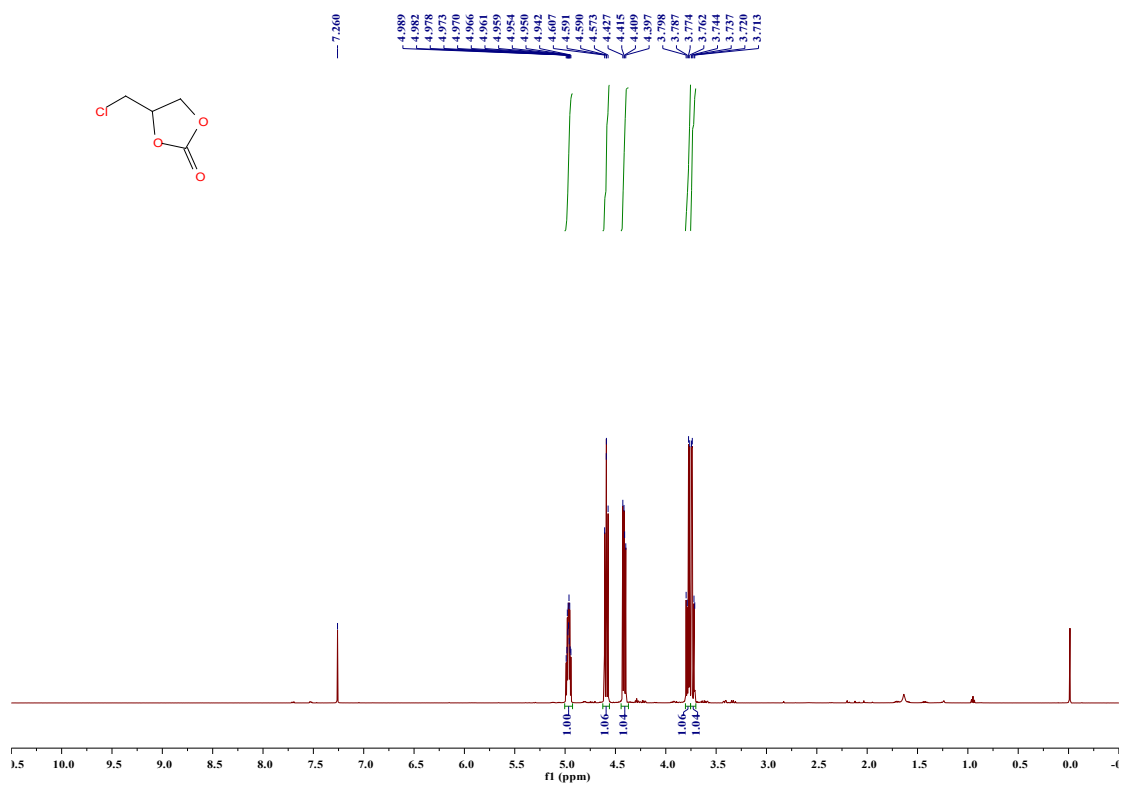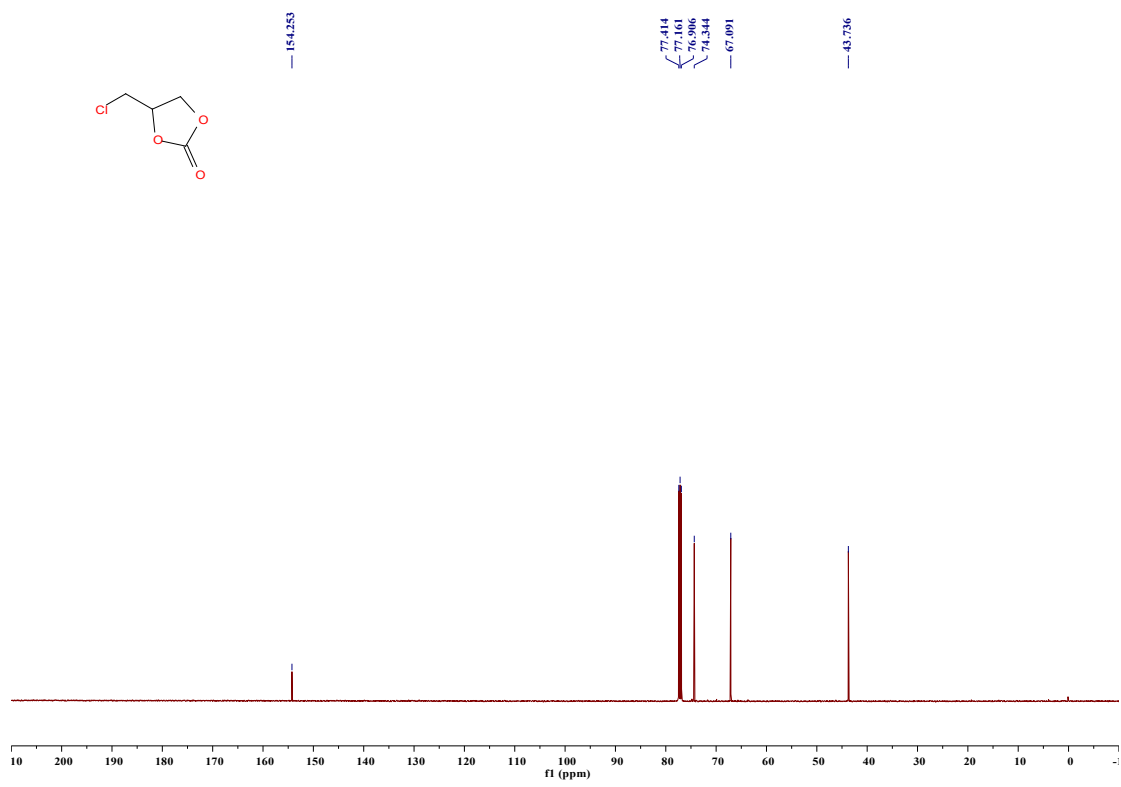

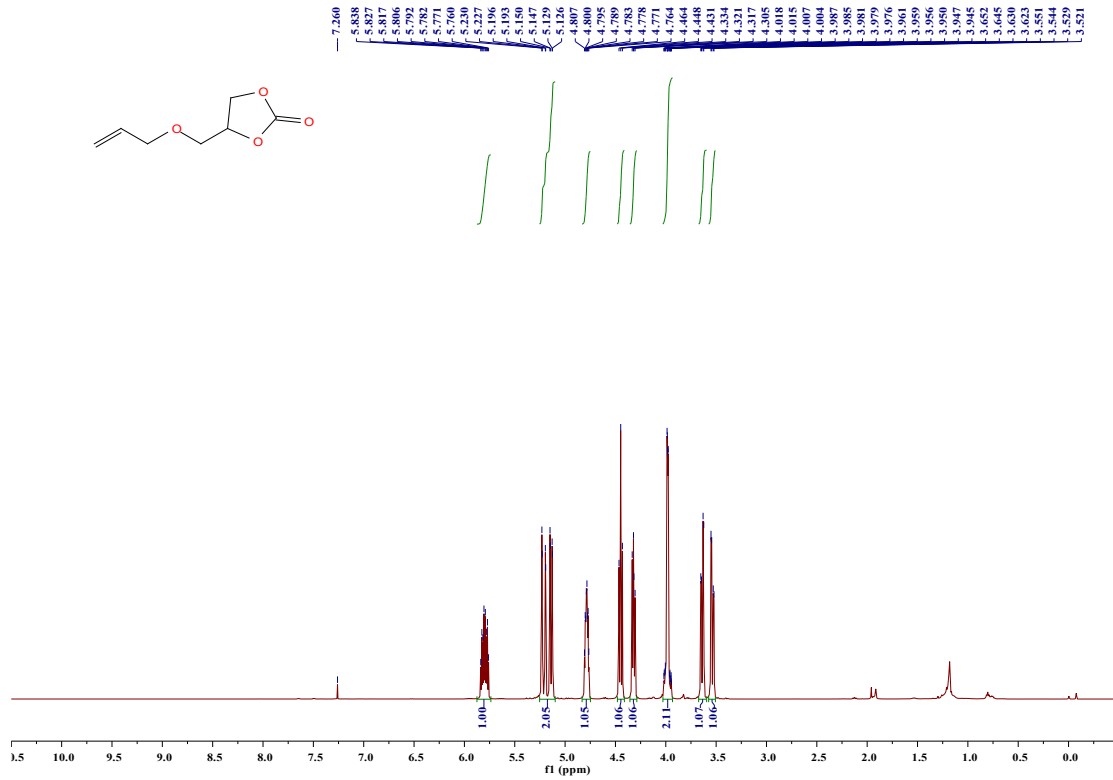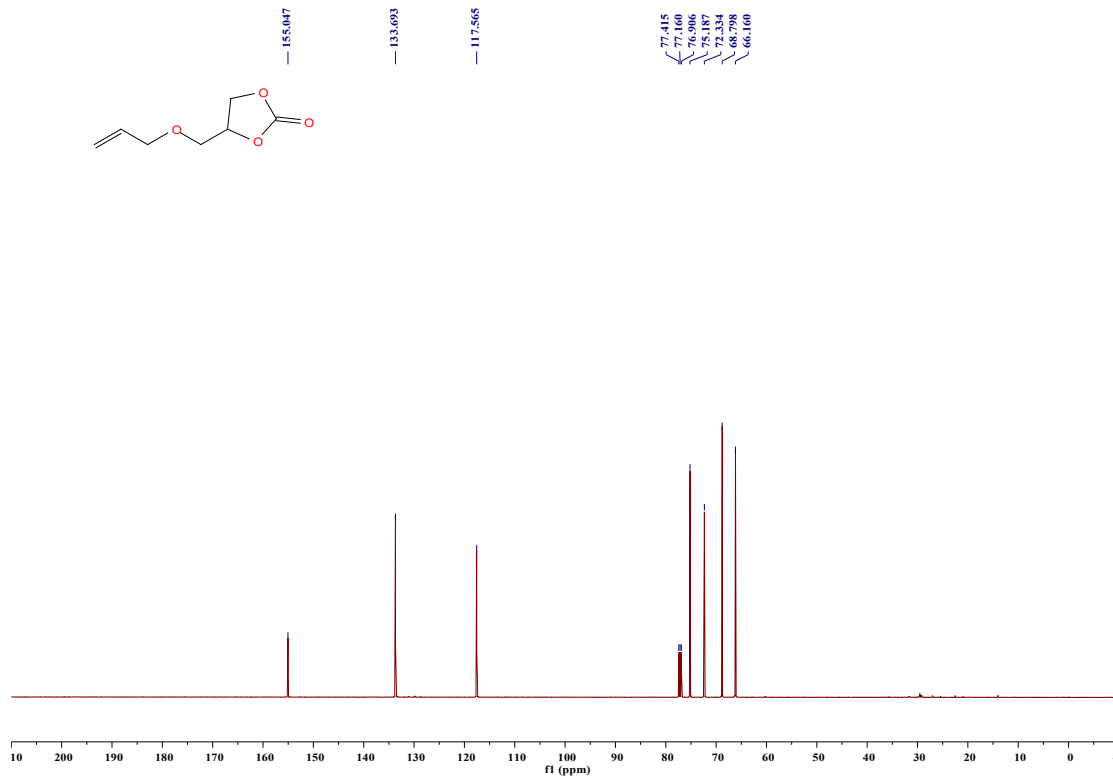

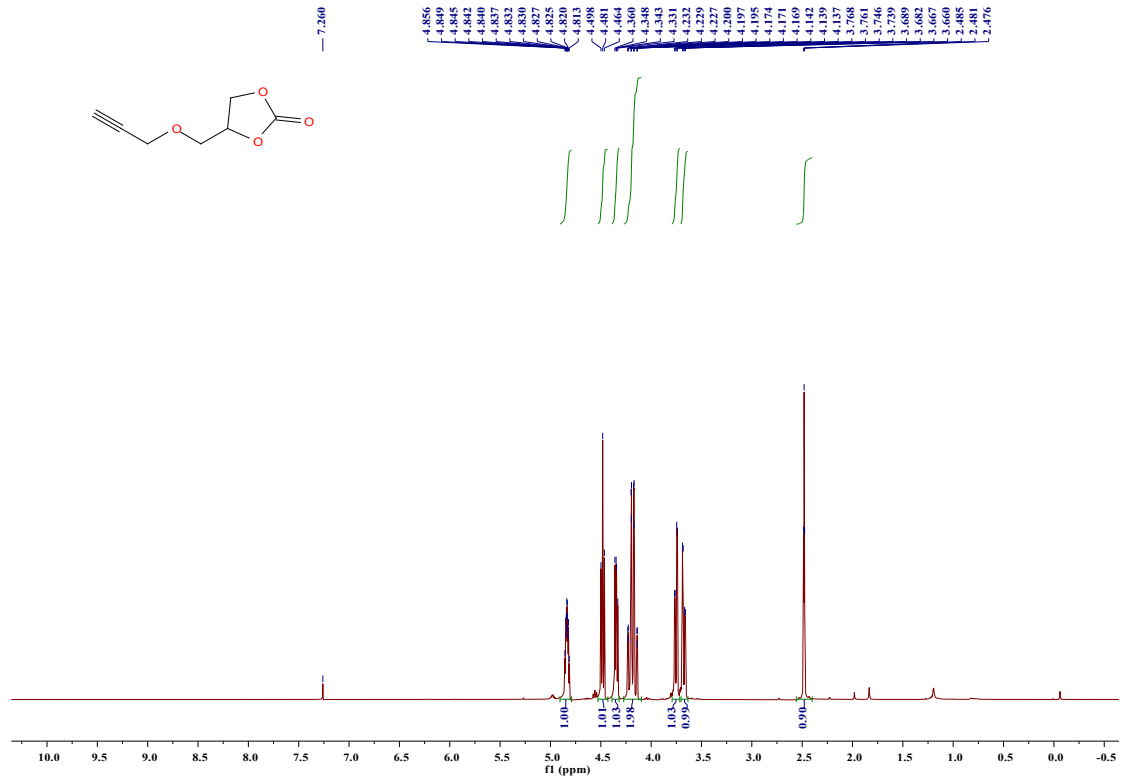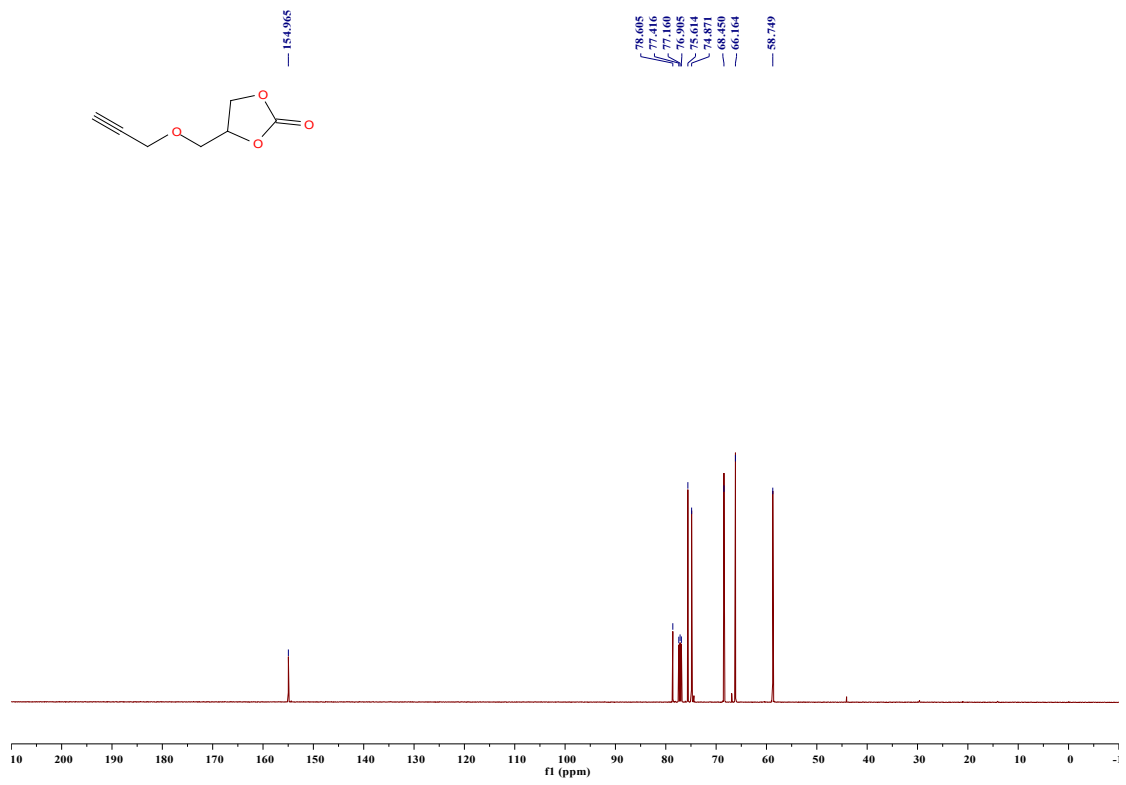

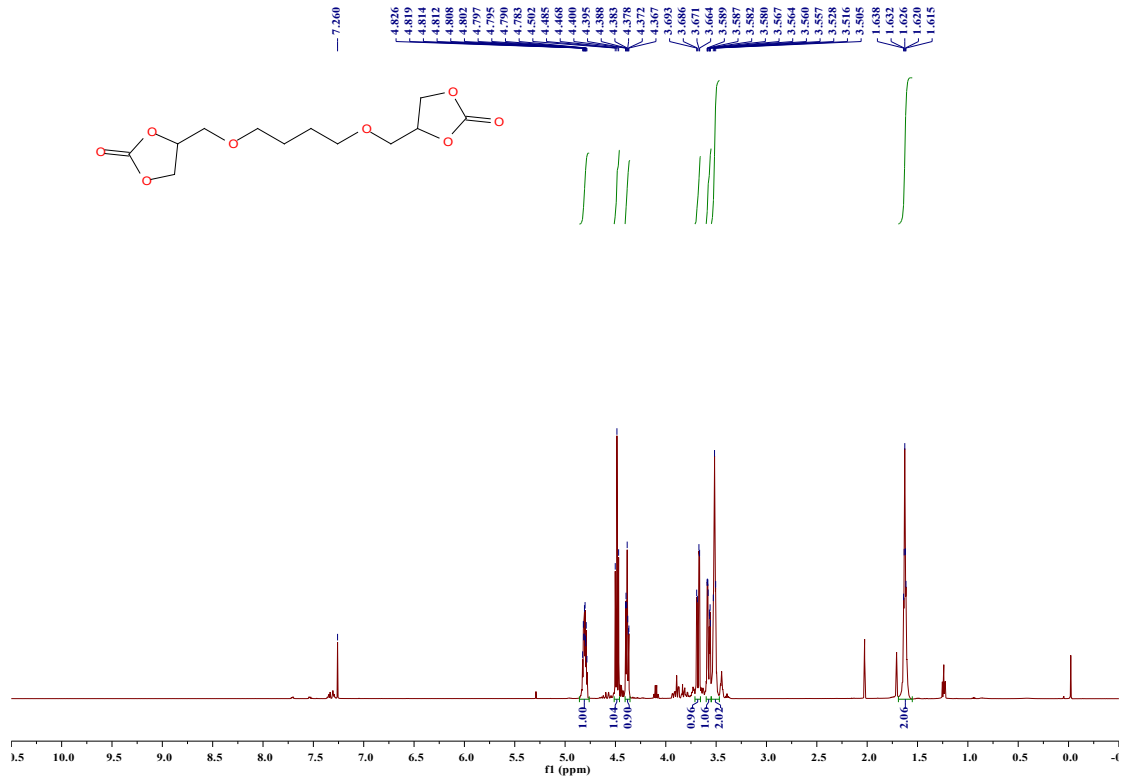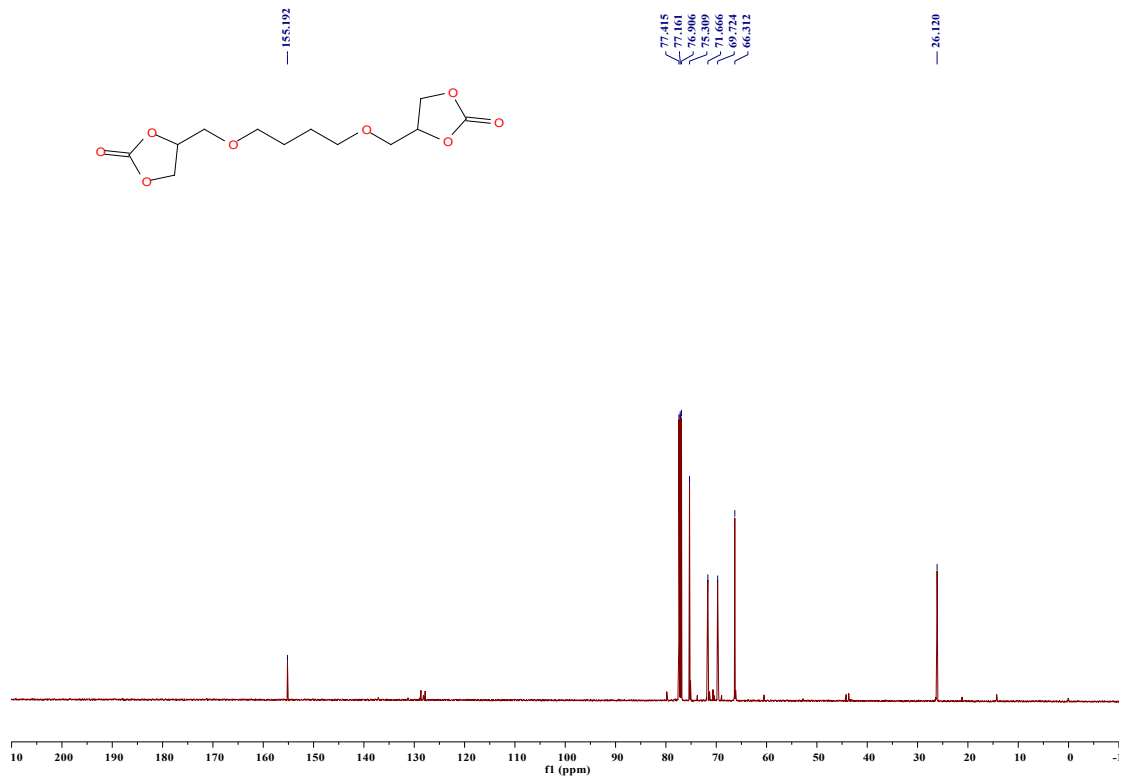

#### 4. Supplementary References

1. R. Wang, J. Wan, H. Guo, B. Tian, S. Li, J. Li, S. Liu, T.D. James, Z. Chen, *Carbon* **2023**, *211*, 118118.
2. X. Meng, Z. Ju, S. Zhang, X. Liang, N. von Solms, X. Zhang, X. Zhang, *Green Chem.* **2019**, *21*, 3456-3463.
3. A. D. Becke, *Phys. Rev. A* **1988**, *38*, 3098-3100.
4. C. T. Lee, W. T. Yang, R. G. Parr, *Phys. Rev. B* **1988**, *37*, 785-789.
5. A. D. Becke, *J. Chem. Phys.* **1993**, *98*, 5648-5652.
6. G. A. Petersson, A. Bennett, T. G. Tensfeldt, M. A. Al-Laham, W. A. Shirley, J. Mantzaris, *J. Chem. Phys.* **1988**, *89*, 2193-2218.
7. G. Petersson, M. A. Al-Laham, *J. Chem. Phys.* **1991**, *94*, 6081-6090.
8. T. Lu, Q. Chen, *Comput. Theor. Chem.* **2021**, *1200*, 113249.
